# Supplementary material for: Ecological plasticity in the gastrointestinal microbiomes of Ethiopian Chlorocebus monkeys
Source: PubMed Central journal article supplement (PMC5758796; doi:10.1038/s41598-017-18435-2), 2018-01-08
Supplement: 41598_2017_18435_MOESM1_ESM.pdf [file 41598_2017_18435_MOESM1_ESM.pdf]

Ecological plasticity in the gastrointestinal microbiomes of Ethiopian *Chlorocebus* monkeys

Pål Trosvik<sup>1\*</sup>, Eli K Rueness<sup>1</sup>, Eric J de Muinck<sup>1</sup>, Amera Moges<sup>2,3</sup> and Addisu Mekonnen<sup>1,3</sup>

<sup>1</sup>Centre for Ecological and Evolutionary Synthesis (CEES), Department of Biosciences, University of Oslo, Norway; <sup>2</sup>Department of Biology, Bahir Dar University, Bahir Dar, Ethiopia and <sup>3</sup>Department of Zoological Sciences, Addis Ababa University, Addis Ababa, Ethiopia

**Supplementary information: Supplementary figures 1-8. Supplementary tables 1-10.**

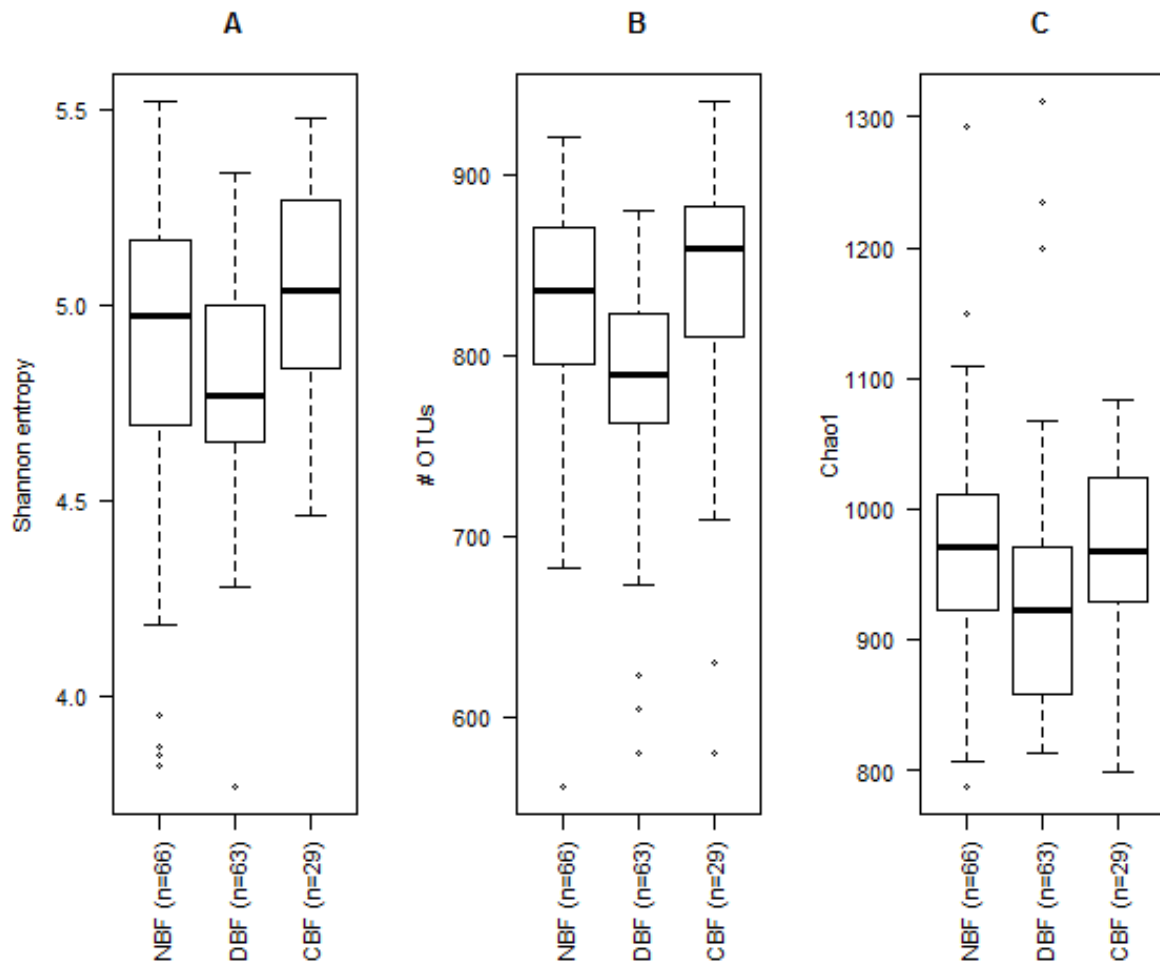

**Supplementary Fig. 1. OTU diversity in the three Bale monkey populations.** (A) Shannon entropy, (B) richness (C) Chao1 diversity estimator. Each box represents the interquartile range while the whiskers represent 1.5 times the interquartile range. Points outside the whiskers represent outliers. NBF=no bamboo forest, DBF=degraded bamboo forest, CBF=continuous bamboo forest.

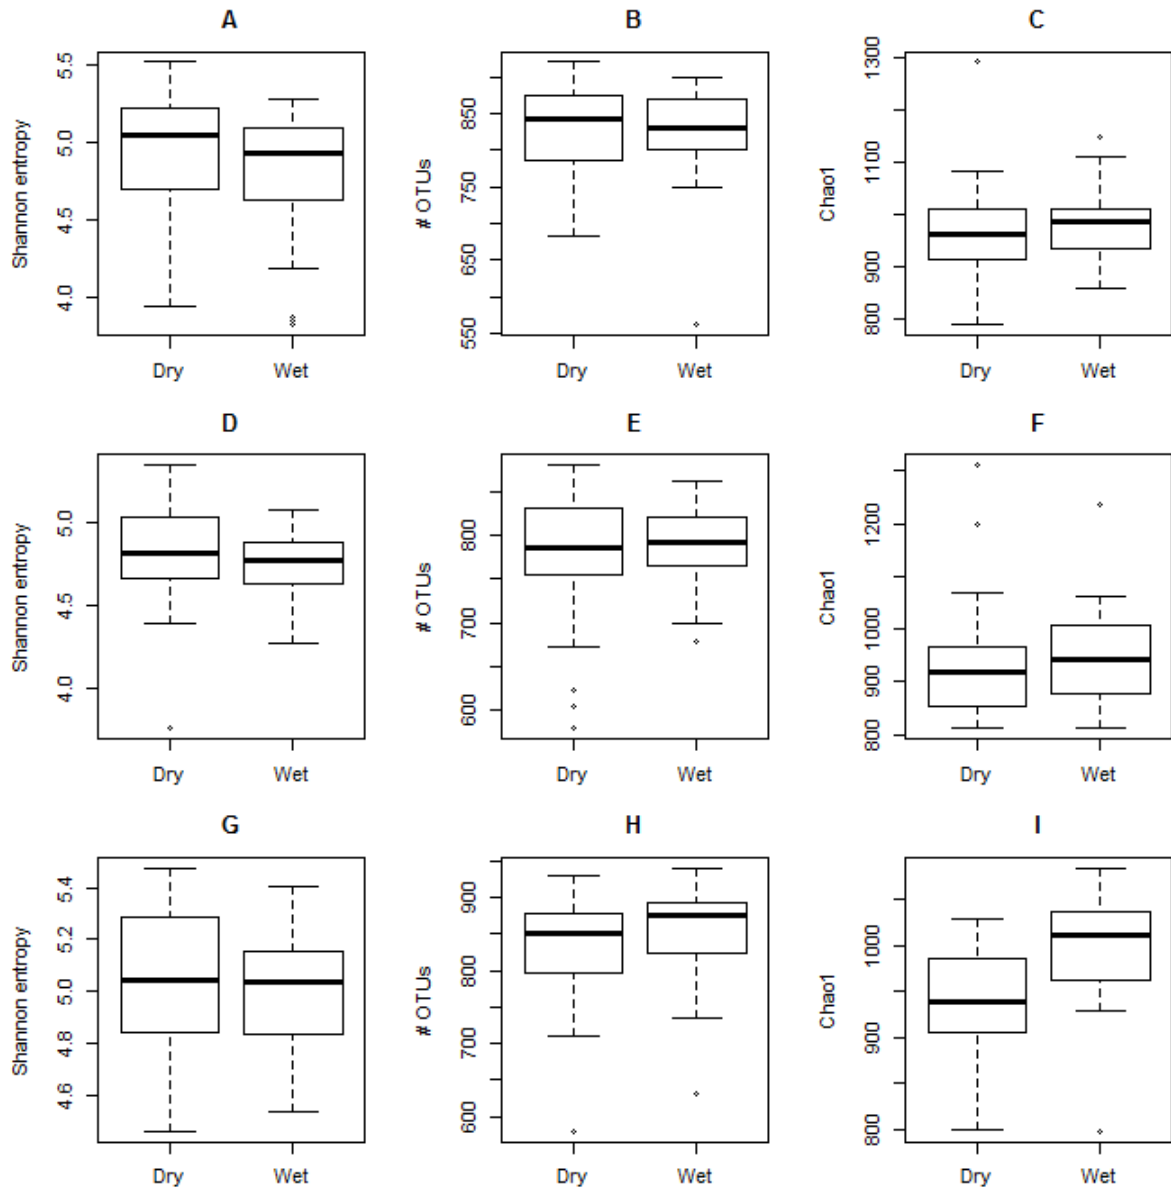

**Supplementary Fig. 2.** Diversity of the GI microbiota in the Bale monkey populations at (A-C) NBF, (D-F) DBF, and (G-H) CBF. Each box represents the interquartile range while the whiskers represent 1.5 times the interquartile range. Points outside the whiskers represent outliers.

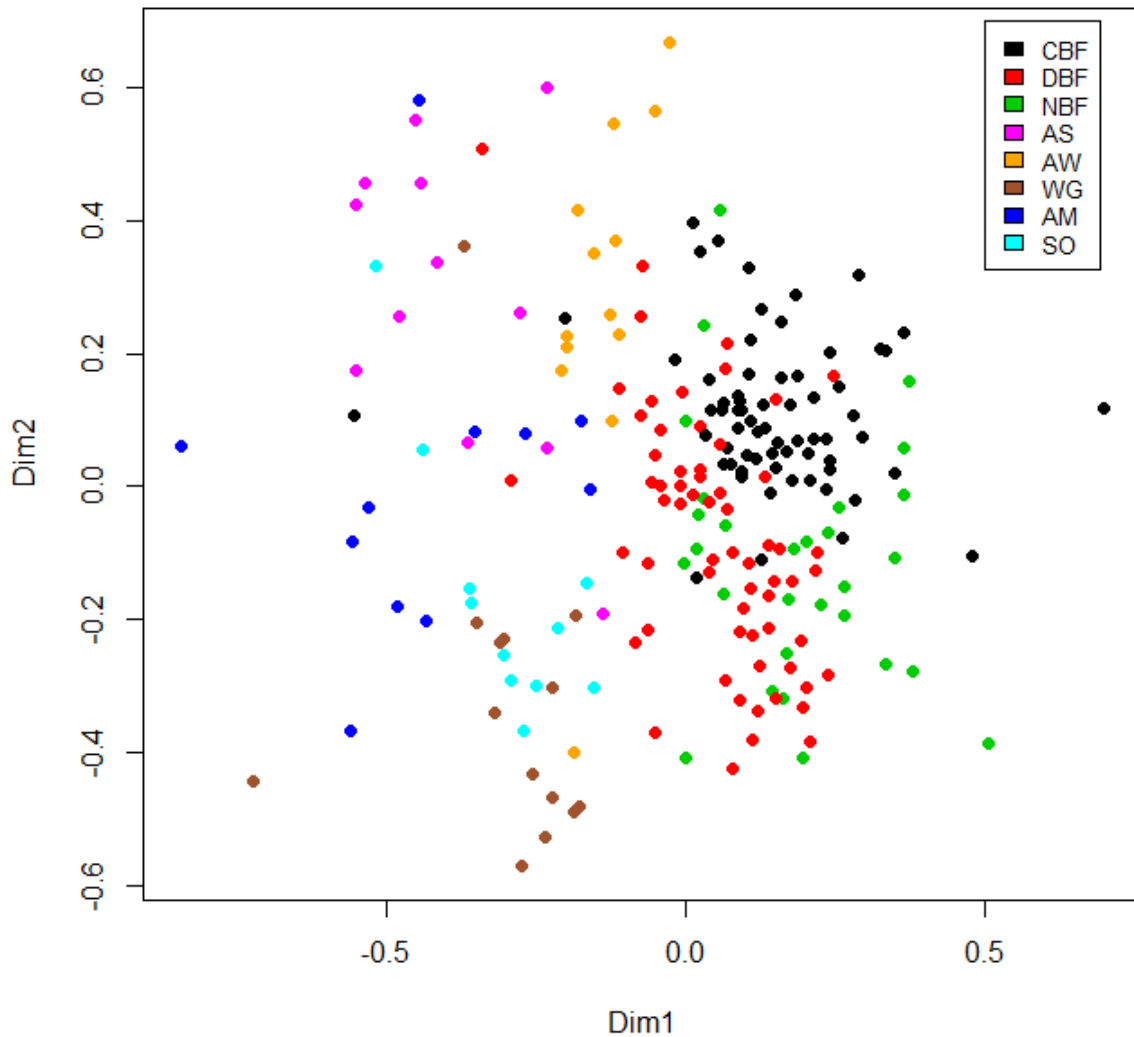

**Supplementary Fig. 3. NMDS of all chlorocebus populations.** NMDS of 158 Bale monkey samples from all three populations (NBF=no bamboo forest, DBF=degraded bamboo forest, CBF=continuous bamboo forest), 39 samples from three grivet populations (AS=Asella, AW=Awassa, WG=Wondo Genet), 11 samples from one vervet population (SO=Sof Omar) and 11 samples from a mixed population with hybrids (AM=Arba Minch). The plot shows the two main dimensions of variation, with dots colour coded according to sampling site (top right corner).

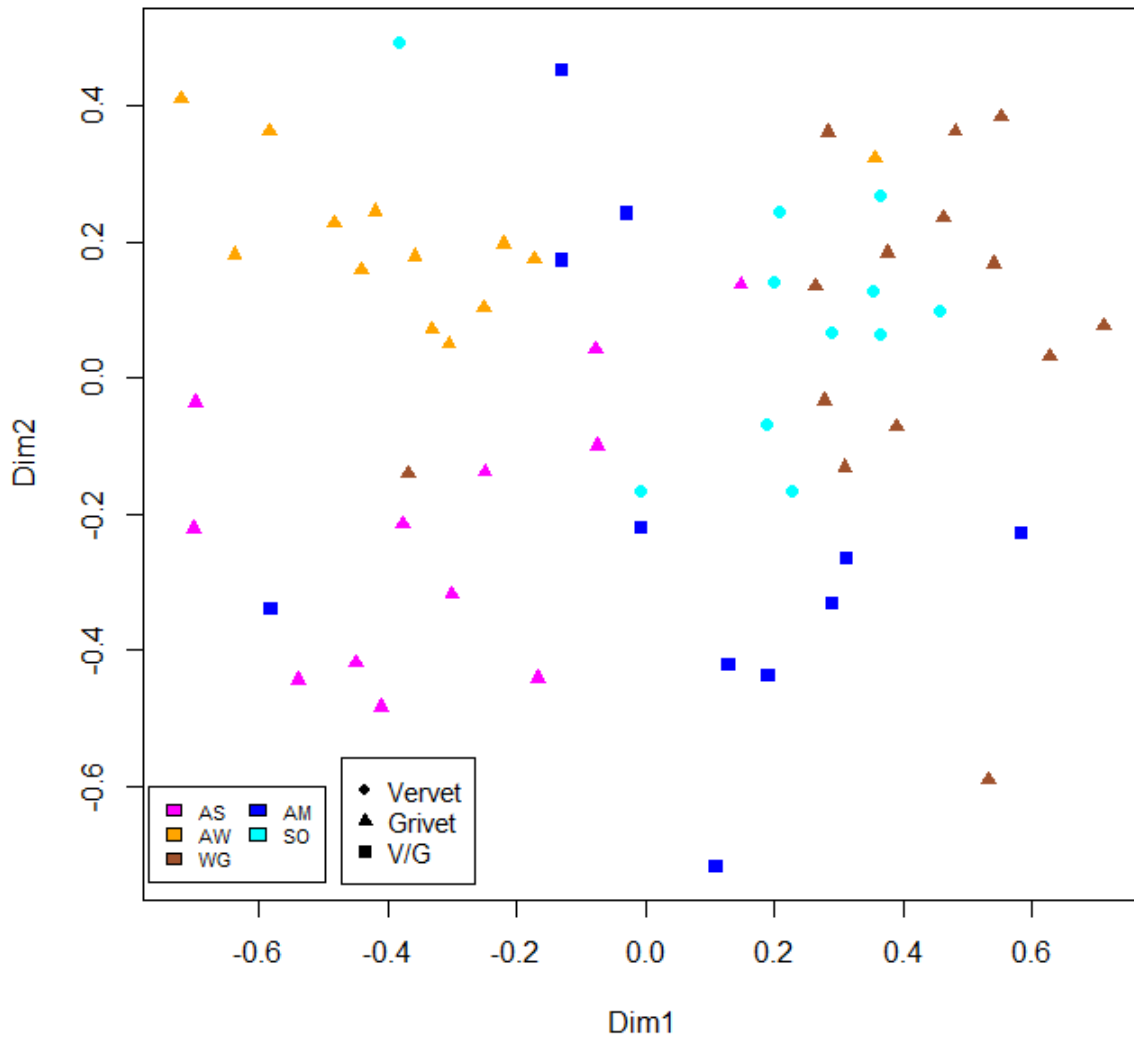

**Supplementary Fig. 4. NMDS of grivet and vervet populations.** NMDS of samples from three grivet populations (AS=Asella (n=12), AW=Awassa (n=13), WG=Wondo Genet (n=14)), one vervet population (SO=Sof Omar (n=11)) and one mixed population with hybrids (Arba Minch (n=11)). The plot shows the two main dimensions of variation, with plotted characters colour coded according to sampling site and shaped according to species (bottom left corner).

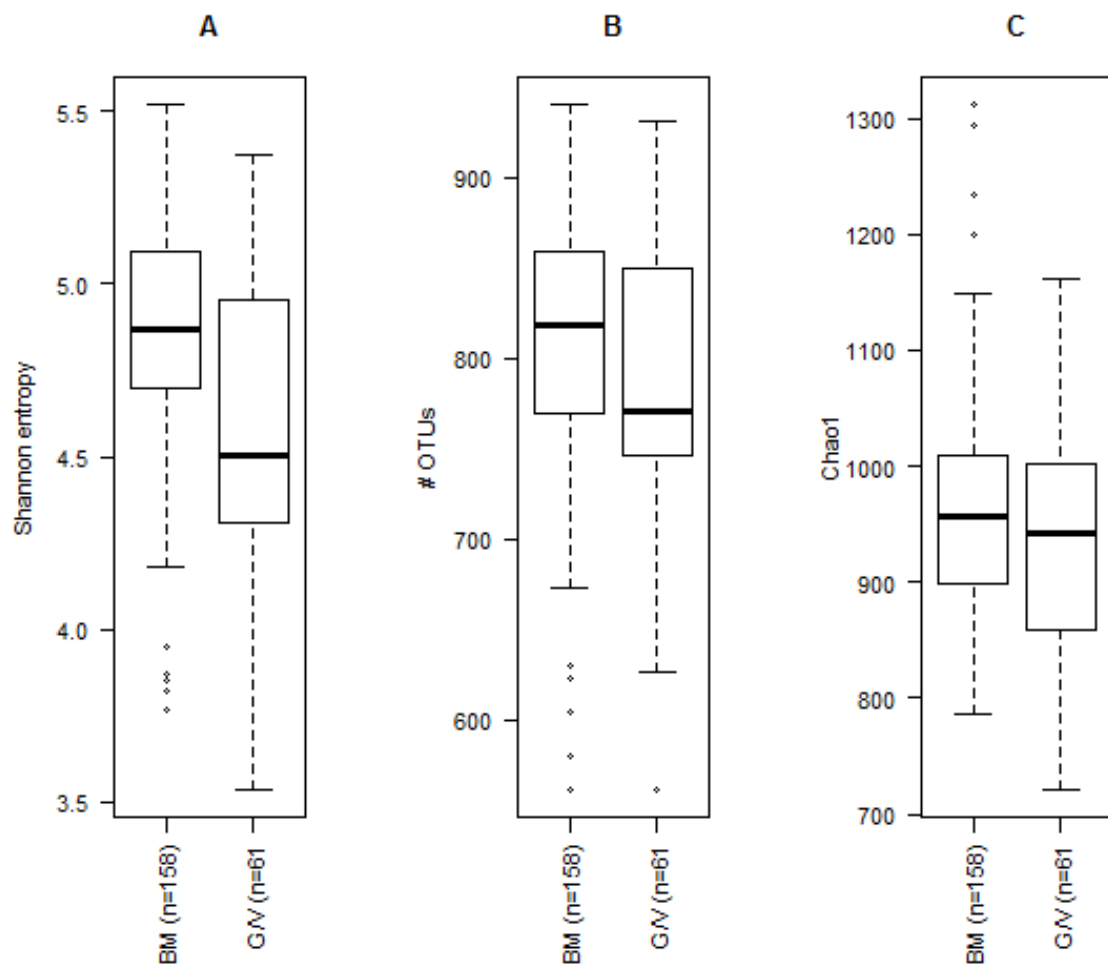

**Supplementary Fig. 5. OTU diversity in all three Bale monkey combined and all five grivet and vervet populations combined.** (A) Shannon entropy, (B) OUT richness, and (C) Chao1 diversity estimator. Each box represents the interquartile range while the whiskers represent 1.5 times the interquartile range. Points outside the whiskers represent outliers. BM=Bale monkey, G/V=vervet/grivet.

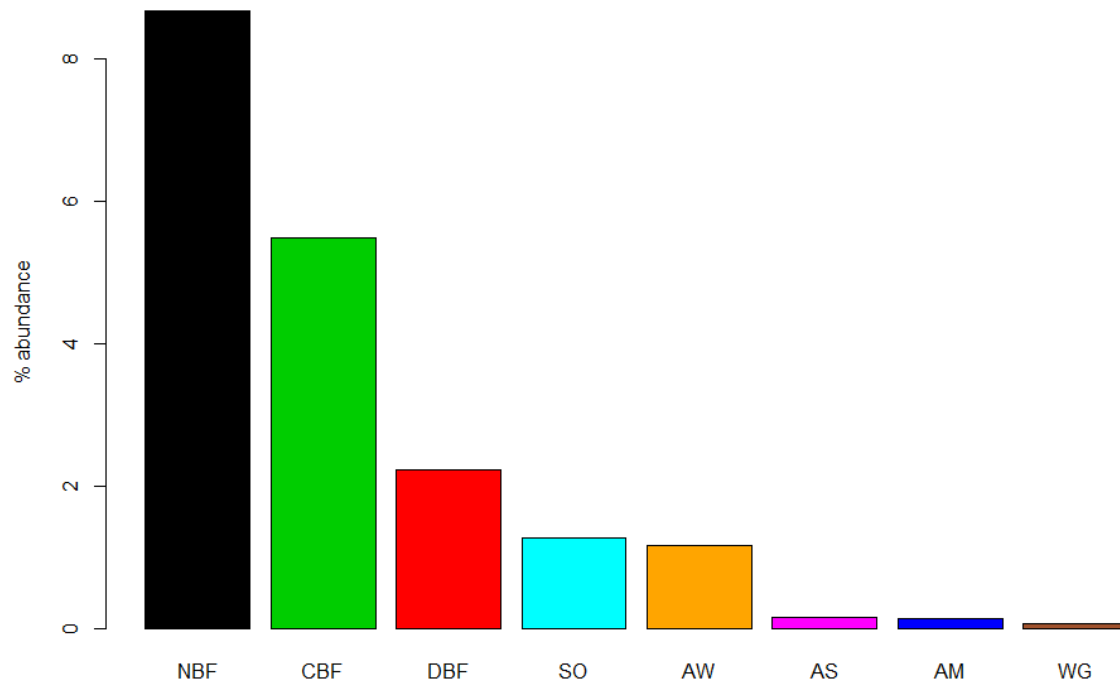

**Supplementary Fig. 6. Percentage of total reads classified as chloroplasts at each sampling site.** Sites are presented as highest (left) to lowest percentage (right). NBF=no bamboo forest, CBF=continuous bamboo forest, DBF=degraded bamboo forest, SO=Sof Omar, AW=Awassa, AS=Asella, AM=Arba Minch, WG=Wondo Genet.

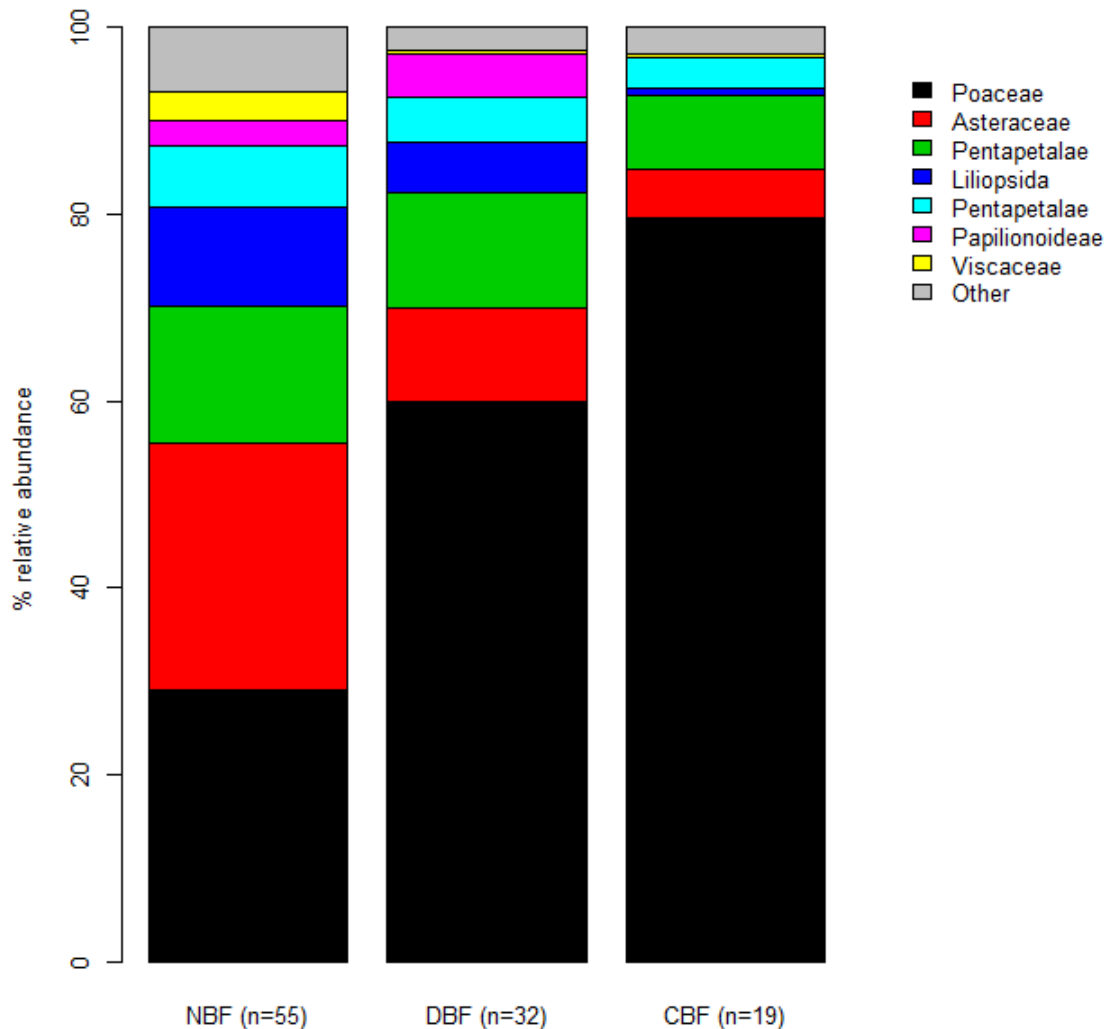

**Supplementary Fig. 7. Relative abundances of the seven top OTUs classified as chloroplasts in the sequence data from the three Bale monkey populations.** The colour key and classification shown on the right hand side give only the high level taxonomy (family and up). Poaceae (Gramineae) is the family of plants that includes grasses such as bamboo. Asteraceae (Compositae) is a very large family of flowering plants that includes dandelions and daisies. Pentapetalae is a high level clade that includes e.g. the families Asteraceae and Rosaceae. Liliopsida is a class containing the lily family. Papilionoideae (Faboideae) is a subfamily of Fabaceae which includes legumes. Viscaceae (Santalaceae) is a family of flowering plants containing mistletoes and sandalwood. NBF = no bamboo forest, DBF = degraded bamboo forest, CBF = continuous bamboo forest.



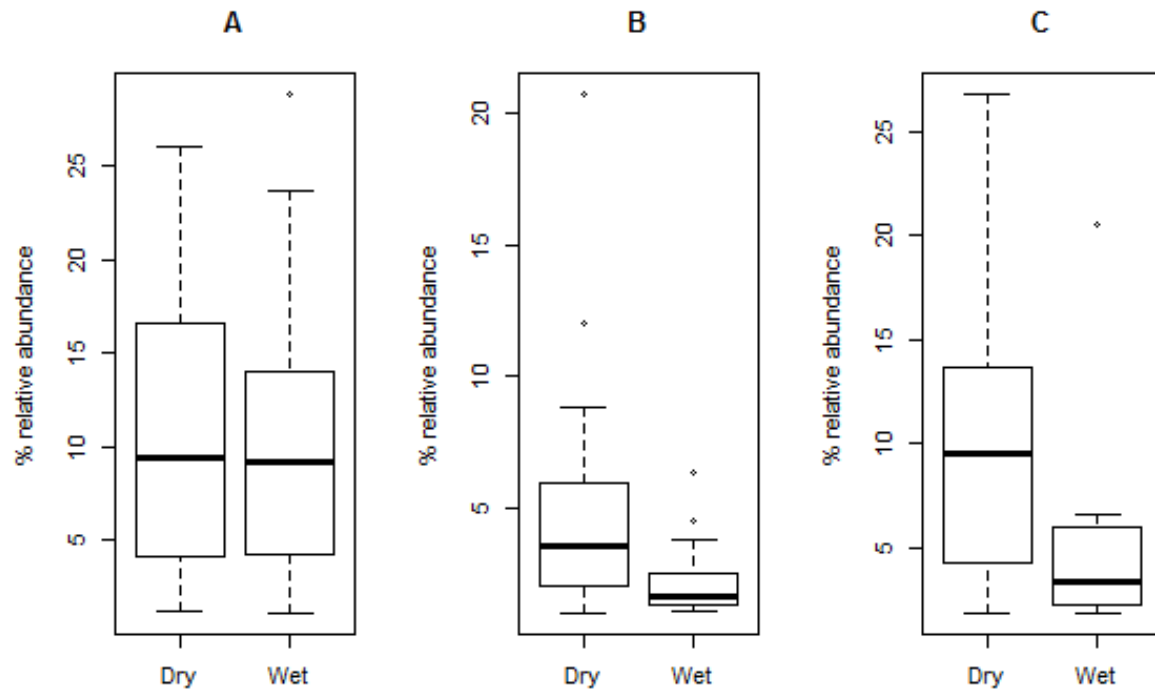

**Supplementary Fig. 8. Percentage of total reads classified as chloroplasts from each of the three Bale monkey populations split into samples collected during the dry and wet seasons.** (A) NBF ( $p=0.66$ , Wilcoxon rank sum test), (B) DBF ( $p=0.04$ ), (C) CBF ( $p=0.13$ ). The lines in the boxes are medians. Each box represents the interquartile range while the whiskers represent 1.5 times the interquartile range. Points outside the whiskers represent outliers.

**Table S1. Results from exact tests showing OTUs with significantly different occurrence in Kokosa relative to Afursa, including full taxonomic assignment, log-fold difference in abundance (logFC), test p-value and false discovery rate (FDR).**

| OTU#    | Taxonomy                                                                                                                                                             | logFC    | PValue   | FDR      |
|---------|----------------------------------------------------------------------------------------------------------------------------------------------------------------------|----------|----------|----------|
| OTU56   | "d: Bacteria(1.0000),p: Bacteroidetes(0.9930),c: Bacteroidia(0.8348),o: Bacteroidales(0.4658),f: Porphyromonadaceae(0.3068),g: Parabacteroides(0.0215);"             | 8.414475 | 1.34E-80 | 2.26E-78 |
| OTU26   | "d: Bacteria(1.0000),p: Tenericutes(0.4731),c: Mollicutes(0.2113),o: Anaeroplasmatales(0.0945),f: Anaeroplasmataceae(0.0296),g: Asteroleplasma(0.0094);"             | 8.69081  | 2.21E-60 | 1.86E-58 |
| OTU185  | "d: Bacteria(1.0000),p: Firmicutes(0.8620),c: Clostridia(0.5845),o: Clostridiales(0.3031),f: Gracilibacteraceae(0.0883),g: Gracilibacter(0.0167);"                   | 2.321396 | 1.70E-17 | 9.51E-16 |
| OTU117  | "d: Bacteria(1.0000),p: Firmicutes(0.7674),c: Clostridia(0.3967),o: Clostridiales(0.1942),f: Lachnospiraceae(0.0454),g: Coprococcus(0.0119);"                        | 2.845983 | 4.87E-16 | 2.05E-14 |
| OTU22   | "d: Bacteria(1.0000),p: Bacteroidetes(0.9922),c: Bacteroidia(0.8348),o: Bacteroidales(0.4658),f: Prevotellaceae(0.1525),g: Paraprevotella(0.0295);"                  | 2.249803 | 1.05E-14 | 3.52E-13 |
| OTU65   | "d: Bacteria(1.0000),p: Firmicutes(0.9914),c: Clostridia(0.8746),o: Clostridiales(0.6422),f: Ruminococcaceae(0.3068),g: Papillibacter(0.0295);"                      | 2.34319  | 1.61E-14 | 4.52E-13 |
| OTU90   | "d: Bacteria(1.0000),p: Firmicutes(0.9970),c: Clostridia(0.9207),o: Clostridiales(0.8197),f: Eubacteriaceae(0.4275),g: Eubacterium(0.1672);"                         | 2.144572 | 3.59E-14 | 8.61E-13 |
| OTU17   | "d: Bacteria(1.0000),p: Tenericutes(0.8384),c: Mollicutes(0.5845),o: Acholeplasmatales(0.2305),f: Acholeplasmataceae(0.1097),g: Acholeplasma(0.0191);"               | -2.55199 | 4.47E-14 | 9.38E-13 |
| OTU64   | "d: Bacteria(1.0000),p: Firmicutes(0.7911),c: Erysipelotrichia(0.3967),o: Erysipelotrichales(0.1942),f: Erysipelotrichaceae(0.0883),g: Clostridium_XVIII(0.0167);"   | 2.69489  | 1.17E-13 | 2.18E-12 |
| OTU73   | "d: Bacteria(1.0000),p: Proteobacteria(0.7674),c: Alphaproteobacteria(0.2113),o: Kiloniellales(0.0400),f: Kiloniellaceae(0.0140),g: Kiloniella(0.0060);"             | -3.53759 | 1.63E-13 | 2.73E-12 |
| OTU83   | "d: Bacteria(1.0000),p: Bacteroidetes(0.8857),c: Flavobacteriia(0.2113),o: Flavobacteriales(0.0945),f: Flavobacteriaceae(0.0296),g: Riemeirella(0.0094);"            | 3.069964 | 4.95E-12 | 7.55E-11 |
| OTU122  | "d: Bacteria(1.0000),p: Firmicutes(0.9999),c: Bacilli(0.9668),o: Lactobacillales(0.9457),f: Lactobacillaceae(0.9026),g: Lactobacillus(0.8158);"                      | -2.05842 | 1.20E-11 | 1.67E-10 |
| OTU31   | "d: Bacteria(1.0000),p: Bacteroidetes(0.9987),c: Bacteroidia(0.9704),o: Bacteroidales(0.9597),f: Rikenellaceae(0.9109),g: Alistipes(0.7814);"                        | 1.868154 | 3.84E-11 | 4.96E-10 |
| OTU87   | "d: Bacteria(1.0000),p: Bacteroidetes(0.9922),c: Bacteroidia(0.8348),o: Bacteroidales(0.4658),f: Porphyromonadaceae(0.3068),g: Barnesiella(0.0215);"                 | 1.832163 | 1.53E-10 | 1.83E-09 |
| OTU45   | "d: Bacteria(0.6389),p: Lentisphaerae(0.0530),c: Lentisphaeria(0.0165),o: Victivallales(0.0062),f: Victivallaceae(0.0015),g: Victivallis(0.0017);"                   | -2.27918 | 2.51E-10 | 2.81E-09 |
| OTU85   | "d: Bacteria(1.0000),p: Bacteroidetes(0.8384),c: Bacteroidia(0.3342),o: Bacteroidales(0.1579),f: Bacteroidaceae(0.0042),g: Bacteroides(0.0034);"                     | 2.953541 | 2.73E-10 | 2.82E-09 |
| OTU135  | "d: Bacteria(1.0000),p: Tenericutes(0.4731),c: Mollicutes(0.2113),o: Acholeplasmatales(0.0945),f: Acholeplasmataceae(0.0296),g: Acholeplasma(0.0094);"               | 2.915778 | 2.86E-10 | 2.82E-09 |
| OTU33   | "d: Bacteria(1.0000),p: Bacteroidetes(0.7911),c: Bacteroidia(0.0345),o: Bacteroidales(0.0136),f: Porphyromonadaceae(0.0061),g: Barnesiella(0.0043);"                 | 1.88703  | 3.71E-10 | 3.46E-09 |
| OTU219  | "d: Bacteria(1.0000),p: Firmicutes(0.9802),c: Clostridia(0.8348),o: Clostridiales(0.4658),f: Lachnospiraceae(0.1525),g: Lachnospiraceae_incertae_sedis(0.0295);"     | -1.85229 | 5.75E-10 | 5.08E-09 |
| OTU520  | "d: Bacteria(1.0000),p: Firmicutes(0.7911),c: Clostridia(0.4593),o: Clostridiales(0.2305),f: Clostridiaceae_1(0.0668),g: Clostridium_sensu_stricto(0.0143);"         | -1.54175 | 9.81E-10 | 8.24E-09 |
| OTU92   | "d: Bacteria(1.0000),p: Firmicutes(0.9993),c: Clostridia(0.9391),o: Clostridiales(0.8477),f: Ruminococcaceae(0.6553),g: Ruminococcus(0.1672);"                       | -2.13053 | 1.79E-09 | 1.40E-08 |
| OTU181  | "d: Bacteria(1.0000),p: Firmicutes(0.9983),c: Clostridia(0.9929),o: Clostridiales(0.9841),f: Lachnospiraceae(0.9274),g: Pseudobutyrvibrio(0.7126);"                  | -1.70877 | 1.83E-09 | 1.40E-08 |
| OTU217  | "d: Bacteria(1.0000),p: Firmicutes(0.3677),c: Clostridia(0.1500),o: Clostridiales(0.0673),f: Ruminococcaceae(0.0140),g: Ruminococcus(0.0060);"                       | 2.531425 | 2.68E-09 | 1.96E-08 |
| OTU20   | "d: Bacteria(1.0000),p: Tenericutes(0.9954),c: Mollicutes(0.9299),o: Anaeroplasmatales(0.7305),f: Anaeroplasmataceae(0.5430),g: Anaeroplasma(0.3238);"               | -2.52331 | 3.02E-09 | 2.11E-08 |
| OTU164  | "d: Bacteria(1.0000),p: Firmicutes(0.9954),c: Clostridia(0.7097),o: Clostridiales(0.3775),f: Lachnospiraceae(0.1861),g: Syntrophococcus(0.0409);"                    | -1.66139 | 1.14E-08 | 7.68E-08 |
| OTU50   | "d: Bacteria(1.0000),p: Actinobacteria(1.0000),c: Actinobacteria(1.0000),o: Bifidobacteriales(0.9966),f: Bifidobacteriaceae(0.9970),g: Bifidobacterium(0.9871);"     | 2.541903 | 1.44E-08 | 9.27E-08 |
| OTU19   | "d: Bacteria(1.0000),p: Bacteroidetes(0.9988),c: Bacteroidia(0.8654),o: Bacteroidales(0.5981),f: Porphyromonadaceae(0.4275),g: Parabacteroides(0.0409);"             | 1.804257 | 1.72E-08 | 1.07E-07 |
| OTU835  | "d: Bacteria(1.0000),p: Bacteroidetes(0.9914),c: Bacteroidia(0.5845),o: Bacteroidales(0.3031),f: Porphyromonadaceae(0.1311),g: Paludibacter(0.0215);"                | 2.374534 | 6.33E-08 | 3.80E-07 |
| OTU228  | "d: Bacteria(1.0000),p: Firmicutes(0.9987),c: Clostridia(0.9522),o: Clostridiales(0.8897),f: Lachnospiraceae(0.7302),g: Anaerostipes(0.5751);"                       | -1.87894 | 1.62E-07 | 9.40E-07 |
| OTU8    | "d: Bacteria(1.0000),p: Bacteroidetes(0.9899),c: Sphingobacteriia(0.3342),o: Sphingobacteriales(0.1579),f: Sphingobacteriaceae(0.0668),g: Mucilaginibacter(0.0143);" | 1.92737  | 2.13E-07 | 1.19E-06 |
| OTU312  | "d: Bacteria(1.0000),p: Firmicutes(0.8620),c: Clostridia(0.6471),o: Clostridiales(0.3394),f: Clostridiaceae_2(0.0883),g: Alkaliphilus(0.0167);"                      | -1.17208 | 2.52E-07 | 1.36E-06 |
| OTU3    | "d: Bacteria(1.0000),p: Bacteroidetes(0.9914),c: Bacteroidia(0.6471),o: Bacteroidales(0.3394),f: Porphyromonadaceae(0.1525),g: Paludibacter(0.0215);"                | 1.576312 | 3.85E-07 | 2.02E-06 |
| OTU374  | "d: Bacteria(1.0000),p: Bacteroidetes(0.9999),c: Bacteroidia(0.9988),o: Bacteroidales(0.9993),f: Prevotellaceae(0.9898),g: Prevotella(0.9914);"                      | 1.503511 | 4.60E-07 | 2.34E-06 |
| OTU208  | "d: Bacteria(1.0000),p: Firmicutes(0.8384),c: Clostridia(0.5845),o: Clostridiales(0.1942),f: Ruminococcaceae(0.0668),g: Clostridium_III(0.0119);"                    | -1.48735 | 8.35E-07 | 4.12E-06 |
| OTU2    | "d: Bacteria(1.0000),p: Firmicutes(0.9987),c: Clostridia(0.9943),o: Clostridiales(0.9954),f: Clostridiaceae_1(0.8778),g: Clostridium_sensu_stricto(0.7126);"         | -2.08635 | 9.71E-07 | 4.66E-06 |
| OTU141  | "d: Bacteria(0.9379),p: Firmicutes(0.1875),c: Clostridia(0.0315),o: Clostridiales(0.0123),f: Clostridiaceae_1(0.0037),g: Clostridium_sensu_stricto(0.0031);"         | -2.58215 | 1.01E-06 | 4.71E-06 |
| OTU98   | "d: Bacteria(1.0000),p: Firmicutes(0.7674),c: Clostridia(0.2725),o: Clostridiales(0.1218),f: Lachnospiraceae(0.0454),g: Anaerostipes(0.0119);"                       | 1.252232 | 1.43E-06 | 6.51E-06 |
| OTU34   | "d: Bacteria(1.0000),p: Proteobacteria(1.0000),c: Epsilonproteobacteria(1.0000),o: Campylobacteriales(1.0000),f: Helicobacteraceae(0.9973),g: Helicobacter(0.9968);" | 1.340366 | 2.67E-06 | 1.15E-05 |
| OTU147  | "d: Bacteria(1.0000),p: Firmicutes(0.9988),c: Clostridia(0.9559),o: Clostridiales(0.9037),f: Lachnospiraceae(0.7302),g: Clostridium_XIVa(0.4804);"                   | -1.50773 | 2.72E-06 | 1.15E-05 |
| OTU21   | "d: Bacteria(1.0000),p: Proteobacteria(0.9987),c: Betaproteobacteria(0.9115),o: Rhodocyclales(0.5981),f: Rhodocyclaceae(0.4275),g: Denitratisoma(0.1672);"           | -1.1549  | 2.75E-06 | 1.15E-05 |
| OTU106  | "d: Bacteria(1.0000),p: Firmicutes(0.8620),c: Clostridia(0.6471),o: Clostridiales(0.3394),f: Ruminococcaceae(0.1097),g: Ruminococcus(0.0143);"                       | 1.428504 | 4.33E-06 | 1.77E-05 |
| OTU5    | "d: Bacteria(1.0000),p: Bacteroidetes(0.9988),c: Bacteroidia(0.9886),o: Bacteroidales(0.9757),f: Prevotellaceae(0.5055),g: Prevotella(0.1672);"                      | 1.604439 | 4.54E-06 | 1.81E-05 |
| OTU136  | "d: Bacteria(1.0000),p: Tenericutes(0.2622),c: Mollicutes(0.0888),o: Entomoplasmatales(0.0400),f: Spiroplasmataceae(0.0140),g: Spiroplasma(0.0060);"                 | -1.45794 | 4.63E-06 | 1.81E-05 |
| OTU235  | "d: Bacteria(1.0000),p: Actinobacteria(0.9914),c: Actinobacteria(0.8562),o: Coriobacteriales(0.5540),f: Coriobacteriaceae(0.3872),g: Slackia(0.0295);"               | -1.09751 | 8.44E-06 | 3.22E-05 |
| OTU1734 | "d: Bacteria(1.0000),p: Proteobacteria(0.3677),c: Deltaproteobacteria(0.1500),o: Bdellovibrionales(0.0673),f: Bdellovibrionaceae(0.0218),g: Vampirovibrio(0.0077);"  | -2.06312 | 1.17E-05 | 4.33E-05 |
| OTU143  | "d: Bacteria(1.0000),p: Firmicutes(0.9994),c: Clostridia(0.9704),o: Clostridiales(0.9597),f: Lachnospiraceae(0.8051),g: Clostridium_XIVa(0.6095);"                   | -1.03216 | 1.19E-05 | 4.33E-05 |
| OTU35   | "d: Bacteria(1.0000),p: Firmicutes(0.8620),c: Clostridia(0.6471),o: Clostridiales(0.2668),f: Ruminococcaceae(0.1311),g: Intestinimonas(0.0191);"                     | 2.045919 | 1.32E-05 | 4.67E-05 |
| OTU93   | "d: Bacteria(1.0000),p: Firmicutes(0.9978),c: Clostridia(0.9299),o: Clostridiales(0.8337),f: Ruminococcaceae(0.5430),g: Sporobacter(0.0865);"                        | 0.9492   | 1.33E-05 | 4.67E-05 |

|         |                                                                                                                                                                                  |          |          |          |
|---------|----------------------------------------------------------------------------------------------------------------------------------------------------------------------------------|----------|----------|----------|
| OTU159  | "d: Bacteria(0.9753),p: Bacteroidetes(0.6840),c: Sphingobacteriia(0.0285),o: Sphingobacteriales(0.0111),f: Sphingobacteriaceae(0.0037),g: Parapedobacter(0.0031);"               | 1.965507 | 1.80E-05 | 6.19E-05 |
| OTU30   | "d: Bacteria(1.0000),p: Firmicutes(0.9992),c: Erysipelotrichia(0.9595),o: Erysipelotrichales(0.9177),f: Erysipelotrichaceae(0.8861),g: Clostridium_XVIII(0.3760);"               | 1.240984 | 1.97E-05 | 6.61E-05 |
| OTU129  | "d: Bacteria(1.0000),p: Firmicutes(0.7674),c: Clostridia(0.3967),o: Clostridiales(0.1942),f: Clostridiaceae_3(0.0668),g: Brassicibacter(0.0143);"                                | -1.4521  | 2.74E-05 | 9.04E-05 |
| OTU61   | "d: Bacteria(1.0000),p: Proteobacteria(0.4731),c: Deltaproteobacteria(0.2113),o: Bdellovibrionales(0.0945),f: Bdellovibrionaceae(0.0296),g: Vampirovibrio(0.0094);"              | -1.41421 | 5.61E-05 | 0.000181 |
| OTU133  | "d: Bacteria(1.0000),p: Firmicutes(0.6840),c: Clostridia(0.3342),o: Clostridiales(0.1218),f: Ruminococcaceae(0.0296),g: Intestinimonas(0.0077);"                                 | 1.357058 | 7.85E-05 | 0.000249 |
| OTU36   | "d: Bacteria(1.0000),p: Bacteroidetes(0.9995),c: Bacteroidia(0.9973),o: Bacteroidales(0.9985),f: Prevotellaceae(0.9687),g: Prevotella(0.9722);"                                  | 1.020711 | 8.43E-05 | 0.000262 |
| OTU49   | "d: Bacteria(1.0000),p: Firmicutes(0.9978),c: Clostridia(0.9391),o: Clostridiales(0.8477),f: Ruminococcaceae(0.6179),g: Oscillibacter(0.0751);"                                  | 0.78532  | 9.46E-05 | 0.000289 |
| OTU126  | "d: Bacteria(1.0000),p: Firmicutes(0.7911),c: Clostridia(0.4593),o: Clostridiales(0.2305),f: Clostridiaceae_4(0.0296),g: Thermotalea(0.0094);"                                   | 1.074896 | 0.000136 | 0.000407 |
| OTU104  | "d: Bacteria(1.0000),p: Firmicutes(0.5785),c: Clostridia(0.2725),o: Clostridiales(0.1218),f: Ruminococcaceae(0.0218),g: Intestinimonas(0.0060);"                                 | -1.50162 | 0.000154 | 0.000455 |
| OTU115  | "d: Bacteria(0.9753),p: Firmicutes(0.1875),c: Clostridia(0.0345),o: Clostridiales(0.0136),f: Clostridiaceae_1(0.0042),g: Caloramator(0.0034);"                                   | 1.368196 | 0.000178 | 0.000517 |
| OTU25   | "d: Bacteria(1.0000),p: Proteobacteria(0.3677),c: Deltaproteobacteria(0.1500),o: Bdellovibrionales(0.0673),f: Bdellovibrionaceae(0.0218),g: Vampirovibrio(0.0077);"              | 1.306584 | 0.000198 | 0.000563 |
| OTU2966 | "d: Bacteria(1.0000),p: Firmicutes(0.9899),c: Clostridia(0.5845),o: Clostridiales(0.3031),f: Ruminococcaceae(0.1525),g: Pseudobacteroides(0.0215);"                              | -0.70987 | 0.000203 | 0.000567 |
| OTU42   | "d: Bacteria(0.7884),p: Proteobacteria(0.1203),c: Deltaproteobacteria(0.0255),o: Bdellovibrionales(0.0099),f: Bdellovibrionaceae(0.0031),g: Vampirovibrio(0.0027);"              | 1.630783 | 0.000226 | 0.000622 |
| OTU265  | "d: Bacteria(1.0000),p: Firmicutes(0.9990),c: Clostridia(0.9559),o: Clostridiales(0.9037),f: Ruminococcaceae(0.8425),g: Clostridium_IV(0.6438);"                                 | -1.44968 | 0.000244 | 0.000661 |
| OTU132  | "d: Bacteria(1.0000),p: Firmicutes(0.8620),c: Clostridia(0.6471),o: Clostridiales(0.3394),f: Clostridiaceae_2(0.0668),g: Alkaliphilus(0.0143);"                                  | -1.34504 | 0.000287 | 0.00076  |
| OTU177  | "d: Bacteria(1.0000),p: Firmicutes(0.9986),c: Clostridia(0.9931),o: Clostridiales(0.9841),f: Ruminococcaceae(0.9687),g: Gemmiger(0.4282);"                                       | -1.10236 | 0.00029  | 0.00076  |
| OTU145  | "d: Bacteria(1.0000),p: Firmicutes(0.5785),c: Erysipelotrichia(0.2113),o: Erysipelotrichales(0.0945),f: Erysipelotrichaceae(0.0296),g: Erysipelothrix(0.0094);"                  | 1.471001 | 0.000452 | 0.001168 |
| OTU62   | "d: Bacteria(1.0000),p: Bacteroidetes(0.9329),c: Bacteroidia(0.8348),o: Bacteroidales(0.4658),f: Prevotellaceae(0.1097),g: Alloprevotella(0.0143);"                              | 1.177416 | 0.000487 | 0.00124  |
| OTU13   | "d: Archaea(1.0000),p: Euryarchaeota(0.9938),c: Thermoplasmata(0.8654),o: Methanomassiliicoccales(0.4658),f: Methanomassiliicoccaceae(0.3068),g: Methanomassiliicoccus(0.0751);" | 1.141677 | 0.000546 | 0.001368 |
| OTU67   | "d: Bacteria(1.0000),p: Firmicutes(0.6840),c: Clostridia(0.3342),o: Clostridiales(0.1579),f: Lachnospiraceae(0.0296),g: Coprococcus(0.0077);"                                    | 0.907359 | 0.000735 | 0.001815 |
| OTU420  | "d: Bacteria(1.0000),p: Firmicutes(0.9986),c: Clostridia(0.9115),o: Clostridiales(0.8057),f: Lachnospiraceae(0.5055),g: Clostridium_XIVa(0.2716);"                               | -0.85549 | 0.000759 | 0.001849 |
| OTU2828 | "d: Bacteria(1.0000),p: Firmicutes(0.9984),c: Clostridia(0.9937),o: Clostridiales(0.9926),f: Ruminococcaceae(0.9847),g: Faecalibacterium(0.8158);"                               | -0.82333 | 0.001001 | 0.002402 |
| OTU112  | "d: Bacteria(1.0000),p: Firmicutes(0.7911),c: Clostridia(0.4593),o: Clostridiales(0.2305),f: Lachnospiraceae(0.0668),g: Coprococcus(0.0143);"                                    | 0.870383 | 0.001018 | 0.00241  |
| OTU1    | "d: Bacteria(1.0000),p: Firmicutes(1.0000),c: Clostridia(0.9958),o: Clostridiales(0.9968),f: Clostridiaceae_1(0.9857),g: Sarcina(0.9722);"                                       | -1.10501 | 0.001187 | 0.00277  |
| OTU733  | "d: Bacteria(1.0000),p: Firmicutes(0.9986),c: Clostridia(0.9886),o: Clostridiales(0.9757),f: Ruminococcaceae(0.9191),g: Ruminococcus(0.7814);"                                   | -1.03631 | 0.001332 | 0.003065 |
| OTU322  | "d: Bacteria(1.0000),p: Firmicutes(0.9990),c: Clostridia(0.9956),o: Clostridiales(0.9966),f: Eubacteriaceae(0.9888),g: Eubacterium(0.9914);"                                     | -0.90925 | 0.001518 | 0.003446 |
| OTU179  | "d: Bacteria(1.0000),p: Firmicutes(0.9962),c: Clostridia(0.9023),o: Clostridiales(0.7746),f: Ruminococcaceae(0.5055),g: Sporobacter(0.0751);"                                    | 0.704973 | 0.001572 | 0.003522 |
| OTU188  | "d: Bacteria(1.0000),p: Firmicutes(0.9914),c: Clostridia(0.8746),o: Clostridiales(0.5540),f: Ruminococcaceae(0.2665),g: Intestinimonas(0.0295);"                                 | 0.827054 | 0.00164  | 0.003626 |
| OTU1160 | "d: Bacteria(1.0000),p: Firmicutes(0.8384),c: Clostridia(0.5845),o: Clostridiales(0.3031),f: Ruminococcaceae(0.1311),g: Ruminococcus(0.0143);"                                   | 0.999041 | 0.00181  | 0.003949 |
| OTU120  | "d: Bacteria(0.6015),p: Firmicutes(0.1427),c: Erysipelotrichia(0.0285),o: Erysipelotrichales(0.0111),f: Erysipelotrichaceae(0.0037),g: Holdemania(0.0031);"                      | -0.92776 | 0.002181 | 0.00464  |
| OTU43   | "d: Bacteria(1.0000),p: Firmicutes(0.8147),c: Clostridia(0.5219),o: Clostridiales(0.2668),f: Ruminococcaceae(0.0668),g: Ruminococcus(0.0094);"                                   | -1.10493 | 0.002182 | 0.00464  |
| OTU39   | "d: Bacteria(1.0000),p: Firmicutes(0.7674),c: Negativicutes(0.2725),o: Selenomonadales(0.1218),f: Veillonellaceae(0.0454),g: Selenomonas(0.0119);"                               | 0.85714  | 0.002217 | 0.004657 |
| OTU192  | "d: Bacteria(1.0000),p: Firmicutes(0.9093),c: Bacilli(0.5219),o: Bacillales(0.2668),f: Paenibacillaceae_1(0.1097),g: Cohnella(0.0191);"                                          | -0.62802 | 0.002612 | 0.005418 |
| OTU485  | "d: Bacteria(1.0000),p: Firmicutes(0.9991),c: Clostridia(0.9559),o: Clostridiales(0.9037),f: Lachnospiraceae(0.6928),g: Clostridium_XIVa(0.3760);"                               | -0.49563 | 0.004107 | 0.008414 |
| OTU201  | "d: Bacteria(1.0000),p: Firmicutes(0.8384),c: Clostridia(0.5845),o: Clostridiales(0.3031),f: Ruminococcaceae(0.1311),g: Ruminococcus(0.0191);"                                   | -0.7377  | 0.004538 | 0.009186 |

**Table S2. Results from exact tests showing OTUs with significantly different occurrence in Odobullu relative to Afursa, including full taxonomic assignment, log-fold difference in abundance (logFC), test p-value and false discovery rate (FDR).**

| OTU#    | Taxonomy                                                                                                                                                                         | logFC    | PValue   | FDR      |
|---------|----------------------------------------------------------------------------------------------------------------------------------------------------------------------------------|----------|----------|----------|
| OTU56   | "d: Bacteria(1.0000),p: Bacteroidetes(0.9930),c: Bacteroidia(0.8348),o: Bacteroidales(0.4658),f: Porphyromonadaceae(0.3068),g: Parabacteroides(0.0215);"                         | 7.992833 | 5.50E-70 | 9.25E-68 |
| OTU26   | "d: Bacteria(1.0000),p: Tenericutes(0.4731),c: Mollicutes(0.2113),o: Anaeroplasmatales(0.0945),f: Anaeroplasmataceae(0.0296),g: Asteroleplasma(0.0094);"                         | 6.839458 | 2.30E-40 | 1.93E-38 |
| OTU21   | "d: Bacteria(1.0000),p: Proteobacteria(0.9987),c: Betaproteobacteria(0.9115),o: Rhodocyclales(0.5981),f: Rhodocyclaceae(0.4275),g: Denitratisoma(0.1672);"                       | -5.09581 | 1.26E-34 | 7.05E-33 |
| OTU179  | "d: Bacteria(1.0000),p: Firmicutes(0.9962),c: Clostridia(0.9023),o: Clostridiales(0.7746),f: Ruminococcaceae(0.5055),g: Sporobacter(0.0751);"                                    | 2.892471 | 1.57E-27 | 6.60E-26 |
| OTU85   | "d: Bacteria(1.0000),p: Bacteroidetes(0.8384),c: Bacteroidia(0.3342),o: Bacteroidales(0.1579),f: Bacteroidaceae(0.0042),g: Bacteroides(0.0034);"                                 | 5.237548 | 2.43E-21 | 8.16E-20 |
| OTU835  | "d: Bacteria(1.0000),p: Bacteroidetes(0.9914),c: Bacteroidia(0.5845),o: Bacteroidales(0.3031),f: Porphyromonadaceae(0.1311),g: Paludibacter(0.0215);"                            | -6.96853 | 3.49E-18 | 9.76E-17 |
| OTU177  | "d: Bacteria(1.0000),p: Firmicutes(0.9986),c: Clostridia(0.9931),o: Clostridiales(0.9841),f: Ruminococcaceae(0.9687),g: Gemmiger(0.4282);"                                       | -3.49745 | 7.66E-14 | 1.84E-12 |
| OTU93   | "d: Bacteria(1.0000),p: Firmicutes(0.9978),c: Clostridia(0.9299),o: Clostridiales(0.8337),f: Ruminococcaceae(0.5430),g: Sporobacter(0.0865);"                                    | 1.874084 | 4.85E-13 | 1.02E-11 |
| OTU22   | "d: Bacteria(1.0000),p: Bacteroidetes(0.9922),c: Bacteroidia(0.8348),o: Bacteroidales(0.4658),f: Prevotellaceae(0.1525),g: Paraprevotella(0.0295);"                              | 2.342064 | 2.15E-12 | 4.02E-11 |
| OTU3    | "d: Bacteria(1.0000),p: Bacteroidetes(0.9914),c: Bacteroidia(0.6471),o: Bacteroidales(0.3394),f: Porphyromonadaceae(0.1525),g: Paludibacter(0.0215);"                            | 2.472215 | 1.00E-11 | 1.68E-10 |
| OTU18   | "d: Bacteria(1.0000),p: Proteobacteria(0.9329),c: Alphaproteobacteria(0.5845),o: Kiloniellales(0.1942),f: Kiloniellaceae(0.0883),g: Kiloniella(0.0167);"                         | -3.75285 | 5.18E-11 | 7.91E-10 |
| OTU45   | "d: Bacteria(0.6389),p: Lentisphaerae(0.0530),c: Lentisphaeria(0.0165),o: Victivallales(0.0062),f: Victivallaceae(0.0015),g: Victivallis(0.0017);"                               | -3.37142 | 2.05E-10 | 2.87E-09 |
| OTU17   | "d: Bacteria(1.0000),p: Tenericutes(0.8384),c: Mollicutes(0.5845),o: Acholeplasmatales(0.2305),f: Acholeplasmataceae(0.1097),g: Acholeplasma(0.0191);"                           | -2.81495 | 3.26E-09 | 4.22E-08 |
| OTU90   | "d: Bacteria(1.0000),p: Firmicutes(0.9970),c: Clostridia(0.9207),o: Clostridiales(0.8197),f: Eubacteriaceae(0.4275),g: Eubacterium(0.1672);"                                     | 1.916869 | 4.29E-09 | 5.15E-08 |
| OTU8    | "d: Bacteria(1.0000),p: Bacteroidetes(0.9899),c: Sphingobacteriia(0.3342),o: Sphingobacteriales(0.1579),f: Sphingobacteriaceae(0.0668),g: Mucilagibacter(0.0143);"               | 2.518286 | 4.61E-09 | 5.17E-08 |
| OTU33   | "d: Bacteria(1.0000),p: Bacteroidetes(0.7911),c: Bacteroidia(0.0345),o: Bacteroidales(0.0136),f: Porphyromonadaceae(0.0061),g: Barnesiella(0.0043);"                             | 1.956923 | 2.14E-08 | 2.25E-07 |
| OTU65   | "d: Bacteria(1.0000),p: Firmicutes(0.9914),c: Clostridia(0.8746),o: Clostridiales(0.6422),f: Ruminococcaceae(0.3068),g: Papillibacter(0.0295);"                                  | 1.923362 | 3.55E-08 | 3.51E-07 |
| OTU202  | "d: Bacteria(1.0000),p: Firmicutes(0.9899),c: Clostridia(0.8348),o: Clostridiales(0.4658),f: Ruminococcaceae(0.2263),g: Clostridium_III(0.0215);"                                | 1.491193 | 1.70E-07 | 1.58E-06 |
| OTU83   | "d: Bacteria(1.0000),p: Bacteroidetes(0.8857),c: Flavobacteriia(0.2113),o: Flavobacteriales(0.0945),f: Flavobacteriaceae(0.0296),g: Riemerella(0.0094);"                         | 2.570017 | 1.78E-07 | 1.58E-06 |
| OTU520  | "d: Bacteria(1.0000),p: Firmicutes(0.7911),c: Clostridia(0.4593),o: Clostridiales(0.2305),f: Clostridiaceae_1(0.0668),g: Clostridium_sensu_stricto(0.0143);"                     | -1.75669 | 3.00E-07 | 2.50E-06 |
| OTU219  | "d: Bacteria(1.0000),p: Firmicutes(0.9802),c: Clostridia(0.8348),o: Clostridiales(0.4658),f: Lachnospiraceae(0.1525),g: Lachnospiraceae_incertae_sedis(0.0295);"                 | -2.1131  | 3.13E-07 | 2.50E-06 |
| OTU348  | "d: Bacteria(1.0000),p: Firmicutes(0.8857),c: Clostridia(0.7097),o: Clostridiales(0.3775),f: Clostridiaceae_2(0.0883),g: Alkaliphilus(0.0167);"                                  | -2.00052 | 5.11E-07 | 3.91E-06 |
| OTU1734 | "d: Bacteria(1.0000),p: Proteobacteria(0.3677),c: Deltaproteobacteria(0.1500),o: Bdellovibrionales(0.0673),f: Bdellovibrionaceae(0.0218),g: Vampirovibrio(0.0077);"              | -3.46787 | 8.97E-07 | 6.56E-06 |
| OTU43   | "d: Bacteria(1.0000),p: Firmicutes(0.8147),c: Clostridia(0.5219),o: Clostridiales(0.2668),f: Ruminococcaceae(0.0668),g: Ruminococcus(0.0094);"                                   | -2.49761 | 1.75E-06 | 1.23E-05 |
| OTU312  | "d: Bacteria(1.0000),p: Firmicutes(0.8620),c: Clostridia(0.6471),o: Clostridiales(0.3394),f: Clostridiaceae_2(0.0883),g: Alkaliphilus(0.0167);"                                  | -1.4519  | 2.11E-06 | 1.42E-05 |
| OTU98   | "d: Bacteria(1.0000),p: Firmicutes(0.7674),c: Clostridia(0.2725),o: Clostridiales(0.1218),f: Lachnospiraceae(0.0454),g: Anaerostipes(0.0119);"                                   | 1.434144 | 3.34E-06 | 2.16E-05 |
| OTU20   | "d: Bacteria(1.0000),p: Tenericutes(0.9954),c: Mollicutes(0.9299),o: Anaeroplasmatales(0.7305),f: Anaeroplasmataceae(0.5430),g: Anaeroplasma(0.3238);"                           | -2.73589 | 4.93E-06 | 3.07E-05 |
| OTU106  | "d: Bacteria(1.0000),p: Firmicutes(0.8620),c: Clostridia(0.6471),o: Clostridiales(0.3394),f: Ruminococcaceae(0.1097),g: Ruminococcus(0.0143);"                                   | 1.621601 | 9.43E-06 | 5.55E-05 |
| OTU185  | "d: Bacteria(1.0000),p: Firmicutes(0.8620),c: Clostridia(0.5845),o: Clostridiales(0.3031),f: Gracilibacteraceae(0.0883),g: Gracilibacter(0.0167);"                               | 1.393046 | 9.57E-06 | 5.55E-05 |
| OTU113  | "d: Bacteria(1.0000),p: Bacteroidetes(0.9987),c: Bacteroidia(0.9924),o: Bacteroidales(0.9799),f: Prevotellaceae(0.4275),g: Prevotella(0.0637);"                                  | 1.789649 | 2.03E-05 | 0.000114 |
| OTU122  | "d: Bacteria(1.0000),p: Firmicutes(0.9999),c: Bacilli(0.9668),o: Lactobacillales(0.9457),f: Lactobacillaceae(0.9026),g: Lactobacillus(0.8158);"                                  | -1.69073 | 3.16E-05 | 0.000171 |
| OTU132  | "d: Bacteria(1.0000),p: Firmicutes(0.8620),c: Clostridia(0.6471),o: Clostridiales(0.3394),f: Clostridiaceae_2(0.0668),g: Alkaliphilus(0.0143);"                                  | -2.13043 | 4.60E-05 | 0.000242 |
| OTU224  | "d: Bacteria(0.2356),p: Proteobacteria(0.0162),c: Alphaproteobacteria(0.0098),o: Rhodospirillales(0.0036),f: Acetobacteraceae(0.0005),g: Stella(0.0009);"                        | 1.474244 | 7.31E-05 | 0.000372 |
| OTU153  | "d: Bacteria(1.0000),p: Firmicutes(0.9989),c: Clostridia(0.9486),o: Clostridiales(0.8757),f: Lachnospiraceae(0.8051),g: Lachnospiraceae_incertae_sedis(0.5751);"                 | 1.44701  | 7.81E-05 | 0.000386 |
| OTU64   | "d: Bacteria(1.0000),p: Firmicutes(0.7911),c: Erysipelotrichia(0.3967),o: Erysipelotrichales(0.1942),f: Erysipelotrichaceae(0.0883),g: Clostridium_XVIII(0.0167);"               | 1.60855  | 8.78E-05 | 0.000421 |
| OTU159  | "d: Bacteria(0.9753),p: Bacteroidetes(0.6840),c: Sphingobacteriia(0.0285),o: Sphingobacteriales(0.0111),f: Sphingobacteriaceae(0.0037),g: Parapedobacter(0.0031);"               | 2.047345 | 0.000104 | 0.000486 |
| OTU32   | "d: Bacteria(1.0000),p: Tenericutes(0.9970),c: Mollicutes(0.9449),o: Anaeroplasmatales(0.8057),f: Anaeroplasmataceae(0.6179),g: Anaeroplasma(0.4282);"                           | -2.05686 | 0.000149 | 0.000679 |
| OTU97   | "d: Bacteria(1.0000),p: Firmicutes(0.9998),c: Clostridia(0.9814),o: Clostridiales(0.9715),f: Lachnospiraceae(0.9026),g: Clostridium_XIVa(0.8158);"                               | 1.444495 | 0.000197 | 0.000859 |
| OTU165  | "d: Bacteria(1.0000),p: Bacteroidetes(0.9994),c: Bacteroidia(0.9969),o: Bacteroidales(0.9981),f: Prevotellaceae(0.9770),g: Prevotella(0.9189);"                                  | 1.429143 | 0.000203 | 0.000859 |
| OTU117  | "d: Bacteria(1.0000),p: Firmicutes(0.7674),c: Clostridia(0.3967),o: Clostridiales(0.1942),f: Lachnospiraceae(0.0454),g: Coprococcus(0.0119);"                                    | 1.467199 | 0.000204 | 0.000859 |
| OTU47   | "d: Bacteria(1.0000),p: Firmicutes(0.9566),c: Clostridia(0.8470),o: Clostridiales(0.5099),f: Ruminococcaceae(0.2263),g: Clostridium_IV(0.0167);"                                 | -1.43729 | 0.000212 | 0.00087  |
| OTU374  | "d: Bacteria(1.0000),p: Bacteroidetes(0.9999),c: Bacteroidia(0.9988),o: Bacteroidales(0.9993),f: Prevotellaceae(0.9898),g: Prevotella(0.9914);"                                  | 1.271883 | 0.000305 | 0.001219 |
| OTU25   | "d: Bacteria(1.0000),p: Proteobacteria(0.3677),c: Deltaproteobacteria(0.1500),o: Bdellovibrionales(0.0673),f: Bdellovibrionaceae(0.0218),g: Vampirovibrio(0.0077);"              | -1.72977 | 0.000392 | 0.001533 |
| OTU115  | "d: Bacteria(0.9753),p: Firmicutes(0.1875),c: Clostridia(0.0345),o: Clostridiales(0.0136),f: Clostridiaceae_1(0.0042),g: Caloramator(0.0034);"                                   | 1.484257 | 0.000557 | 0.002128 |
| OTU1219 | "d: Bacteria(1.0000),p: Proteobacteria(0.5785),c: Deltaproteobacteria(0.2725),o: Bdellovibrionales(0.1218),f: Bdellovibrionaceae(0.0454),g: Vampirovibrio(0.0119);"              | 1.508311 | 0.000676 | 0.002522 |
| OTU34   | "d: Bacteria(1.0000),p: Proteobacteria(1.0000),c: Epsilonproteobacteria(1.0000),o: Campylobacteriales(1.0000),f: Helicobacteraceae(0.9973),g: Helicobacter(0.9968);"             | 1.14421  | 0.000748 | 0.00273  |
| OTU13   | "d: Archaea(1.0000),p: Euryarchaeota(0.9938),c: Thermoplasmata(0.8654),o: Methanomassiliicoccales(0.4658),f: Methanomassiliicoccaceae(0.3068),g: Methanomassiliicoccus(0.0751);" | 1.319878 | 0.000764 | 0.00273  |
| OTU67   | "d: Bacteria(1.0000),p: Firmicutes(0.6840),c: Clostridia(0.3342),o: Clostridiales(0.1579),f: Lachnospiraceae(0.0296),g: Coprococcus(0.0077);"                                    | 1.038025 | 0.001308 | 0.004578 |

|         |                                                                                                                                                              |          |          |          |
|---------|--------------------------------------------------------------------------------------------------------------------------------------------------------------|----------|----------|----------|
| OTU63   | "d: Bacteria(1.0000),p: Firmicutes(0.5785),c: Clostridia(0.0888),o: Clostridiales(0.0400),f: Lachnospiraceae(0.0061),g: Lachnospira(0.0043);"                | -1.91691 | 0.001569 | 0.00538  |
| OTU76   | "d: Bacteria(1.0000),p: Firmicutes(0.9996),c: Clostridia(0.9741),o: Clostridiales(0.9672),f: Lachnospiraceae(0.8778),g: Clostridium_XIVa(0.7126);"           | -1.0302  | 0.001724 | 0.005792 |
| OTU91   | "d: Bacteria(1.0000),p: Firmicutes(0.9946),c: Clostridia(0.5845),o: Clostridiales(0.3031),f: Clostridiaceae_1(0.1525),g: Anaerospobacter(0.0295);"           | -0.99556 | 0.001813 | 0.005973 |
| OTU4    | "d: Bacteria(1.0000),p: Spirochaetes(0.7911),c: Spirochaetia(0.4593),o: Spirochaetales(0.2305),f: Spirochaetaceae(0.1097),g: Spirochaeta(0.0094);"           | -1.54247 | 0.002002 | 0.006467 |
| OTU2828 | "d: Bacteria(1.0000),p: Firmicutes(0.9984),c: Clostridia(0.9937),o: Clostridiales(0.9926),f: Ruminococcaceae(0.9847),g: Faecalibacterium(0.8158);"           | -1.01428 | 0.002349 | 0.007445 |
| OTU428  | "d: Bacteria(1.0000),p: Firmicutes(0.9899),c: Clostridia(0.7723),o: Clostridiales(0.4216),f: Clostridiaceae_1(0.1311),g: Clostridium_sensu_stricto(0.0215);" | -0.94408 | 0.002509 | 0.007804 |

**Table S3. Results from exact tests showing OTUs with significantly different occurrence in Odobullu relative to Kokosa, including full taxonomic assignment, log-fold difference in abundance (logFC), test p-value and false discovery rate (FDR).**

| OTU#   | Taxonomy                                                                                                                                                            | logFC    | PValue   | FDR      |
|--------|---------------------------------------------------------------------------------------------------------------------------------------------------------------------|----------|----------|----------|
| OTU835 | "d: Bacteria(1.0000),p: Bacteroidetes(0.9914),c: Bacteroidia(0.5845),o: Bacteroidales(0.3031),f: Porphyromonadaceae(0.1311),g: Paludibacter(0.0215);"               | -9.33901 | 8.83E-26 | 1.48E-23 |
| OTU21  | "d: Bacteria(1.0000),p: Proteobacteria(0.9987),c: Betaproteobacteria(0.9115),o: Rhodocyclales(0.5981),f: Rhodocyclaceae(0.4275),g: Denitratisoma(0.1672);"          | -3.94013 | 4.70E-24 | 3.95E-22 |
| OTU179 | "d: Bacteria(1.0000),p: Firmicutes(0.9962),c: Clostridia(0.9023),o: Clostridiales(0.7746),f: Ruminococcaceae(0.5055),g: Sporobacter(0.0751);"                       | 2.187449 | 3.96E-16 | 2.22E-14 |
| OTU202 | "d: Bacteria(1.0000),p: Firmicutes(0.9899),c: Clostridia(0.8348),o: Clostridiales(0.4658),f: Ruminococcaceae(0.2263),g: Clostridium_III(0.0215);"                   | 1.672245 | 6.33E-09 | 2.51E-07 |
| OTU18  | "d: Bacteria(1.0000),p: Proteobacteria(0.9329),c: Alphaproteobacteria(0.5845),o: Kiloniellales(0.1942),f: Kiloniellaceae(0.0883),g: Kiloniella(0.0167);"            | -3.1887  | 8.60E-09 | 2.51E-07 |
| OTU25  | "d: Bacteria(1.0000),p: Proteobacteria(0.3677),c: Deltaproteobacteria(0.1500),o: Bdellovibrionales(0.0673),f: Bdellovibrionaceae(0.0218),g: Vampirovibrio(0.0077);" | -3.03627 | 8.95E-09 | 2.51E-07 |
| OTU177 | "d: Bacteria(1.0000),p: Firmicutes(0.9986),c: Clostridia(0.9931),o: Clostridiales(0.9841),f: Ruminococcaceae(0.9687),g: Gemmiger(0.4282);"                          | -2.39453 | 5.02E-08 | 1.20E-06 |
| OTU19  | "d: Bacteria(1.0000),p: Bacteroidetes(0.9988),c: Bacteroidia(0.8654),o: Bacteroidales(0.5981),f: Porphyromonadaceae(0.4275),g: Parabacteroides(0.0409);"            | -2.37059 | 2.02E-07 | 4.25E-06 |
| OTU32  | "d: Bacteria(1.0000),p: Tenericutes(0.9970),c: Mollicutes(0.9449),o: Anaeroplasmatales(0.8057),f: Anaeroplasmataceae(0.6179),g: Anaeroplasma(0.4282);"              | -2.93843 | 2.89E-07 | 5.39E-06 |
| OTU73  | "d: Bacteria(1.0000),p: Proteobacteria(0.7674),c: Alphaproteobacteria(0.2113),o: Kiloniellales(0.0400),f: Kiloniellaceae(0.0140),g: Kiloniella(0.0060);"            | 2.600434 | 5.70E-07 | 9.58E-06 |
| OTU126 | "d: Bacteria(1.0000),p: Firmicutes(0.7911),c: Clostridia(0.4593),o: Clostridiales(0.2305),f: Clostridiaceae_4(0.0296),g: Thermotalea(0.0094);"                      | -1.9175  | 1.35E-06 | 2.06E-05 |
| OTU348 | "d: Bacteria(1.0000),p: Firmicutes(0.8857),c: Clostridia(0.7097),o: Clostridiales(0.3775),f: Clostridiaceae_2(0.0883),g: Alkaliphilus(0.0167);"                     | -1.90455 | 1.66E-06 | 2.33E-05 |
| OTU235 | "d: Bacteria(1.0000),p: Actinobacteria(0.9914),c: Actinobacteria(0.8562),o: Coriobacteriales(0.5540),f: Coriobacteriaceae(0.3872),g: Slackia(0.0295);"              | 1.387921 | 2.61E-06 | 3.37E-05 |
| OTU52  | "d: Bacteria(1.0000),p: Firmicutes(0.7674),c: Clostridia(0.3967),o: Clostridiales(0.1218),f: Ruminococcaceae(0.0454),g: Ruminococcus(0.0094);"                      | 2.579006 | 3.71E-06 | 4.46E-05 |
| OTU85  | "d: Bacteria(1.0000),p: Bacteroidetes(0.8384),c: Bacteroidia(0.3342),o: Bacteroidales(0.1579),f: Bacteroidaceae(0.0042),g: Bacteroides(0.0034);"                    | 2.283826 | 1.45E-05 | 0.000162 |
| OTU42  | "d: Bacteria(0.7884),p: Proteobacteria(0.1203),c: Deltaproteobacteria(0.0255),o: Bdellovibrionales(0.0099),f: Bdellovibrionaceae(0.0031),g: Vampirovibrio(0.0027);" | -2.76106 | 2.32E-05 | 0.000244 |
| OTU4   | "d: Bacteria(1.0000),p: Spirochaetes(0.7911),c: Spirochaetia(0.4593),o: Spirochaetales(0.2305),f: Spirochaetaceae(0.1097),g: Spirochaeta(0.0094);"                  | -2.11368 | 4.33E-05 | 0.000425 |
| OTU143 | "d: Bacteria(1.0000),p: Firmicutes(0.9994),c: Clostridia(0.9704),o: Clostridiales(0.9597),f: Lachnospiraceae(0.8051),g: Clostridium_XIVa(0.6095);"                  | 1.157632 | 4.55E-05 | 0.000425 |
| OTU62  | "d: Bacteria(1.0000),p: Bacteroidetes(0.9329),c: Bacteroidia(0.8348),o: Bacteroidales(0.4658),f: Prevotellaceae(0.1097),g: Alloprevotella(0.0143);"                 | -1.91835 | 5.71E-05 | 0.000505 |
| OTU217 | "d: Bacteria(1.0000),p: Firmicutes(0.3677),c: Clostridia(0.1500),o: Clostridiales(0.0673),f: Ruminococcaceae(0.0140),g: Ruminococcus(0.0060);"                      | -2.31671 | 9.38E-05 | 0.000788 |
| OTU181 | "d: Bacteria(1.0000),p: Firmicutes(0.9983),c: Clostridia(0.9929),o: Clostridiales(0.9841),f: Lachnospiraceae(0.9274),g: Pseudobutyrvibrio(0.7126);"                 | 1.281214 | 0.000132 | 0.001056 |
| OTU224 | "d: Bacteria(0.2356),p: Proteobacteria(0.0162),c: Alphaproteobacteria(0.0098),o: Rhodospirillales(0.0036),f: Acetobacteraceae(0.0005),g: Stella(0.0009);"           | 1.411335 | 0.000175 | 0.001335 |
| OTU108 | "d: Bacteria(1.0000),p: Firmicutes(0.9992),c: Clostridia(0.9486),o: Clostridiales(0.8757),f: Ruminococcaceae(0.6553),g: Papillibacter(0.1150);"                     | -1.5772  | 0.000188 | 0.001373 |
| OTU30  | "d: Bacteria(1.0000),p: Firmicutes(0.9992),c: Erysipelotrichia(0.9595),o: Erysipelotrichales(0.9177),f: Erysipelotrichaceae(0.8861),g: Clostridium_XVIII(0.3760);"  | -1.45065 | 0.000271 | 0.0019   |
| OTU47  | "d: Bacteria(1.0000),p: Firmicutes(0.9566),c: Clostridia(0.8470),o: Clostridiales(0.5099),f: Ruminococcaceae(0.2263),g: Clostridium_IV(0.0167);"                    | -1.36896 | 0.000423 | 0.00284  |
| OTU93  | "d: Bacteria(1.0000),p: Firmicutes(0.9978),c: Clostridia(0.9299),o: Clostridiales(0.8337),f: Ruminococcaceae(0.5430),g: Sporobacter(0.0865);"                       | 0.924848 | 0.000496 | 0.003202 |
| OTU99  | "d: Bacteria(1.0000),p: Actinobacteria(0.9938),c: Actinobacteria(0.8931),o: Coriobacteriales(0.7305),f: Coriobacteriaceae(0.5430),g: Slackia(0.0751);"              | 1.143596 | 0.000528 | 0.003228 |
| OTU76  | "d: Bacteria(1.0000),p: Firmicutes(0.9996),c: Clostridia(0.9741),o: Clostridiales(0.9672),f: Lachnospiraceae(0.8778),g: Clostridium_XIVa(0.7126);"                  | -1.14841 | 0.000545 | 0.003228 |
| OTU7   | "d: Bacteria(1.0000),p: Firmicutes(0.9991),c: Clostridia(0.9964),o: Clostridiales(0.9975),f: Ruminococcaceae(0.9973),g: Faecalibacterium(0.9829);"                  | -0.90103 | 0.000569 | 0.003228 |
| OTU133 | "d: Bacteria(1.0000),p: Firmicutes(0.6840),c: Clostridia(0.3342),o: Clostridiales(0.1218),f: Ruminococcaceae(0.0296),g: Intestinimonas(0.0077);"                    | -1.63768 | 0.000581 | 0.003228 |
| OTU135 | "d: Bacteria(1.0000),p: Tenericutes(0.4731),c: Mollicutes(0.2113),o: Acholeplasmatales(0.0945),f: Acholeplasmataceae(0.0296),g: Acholeplasma(0.0094);"              | -2.16688 | 0.000596 | 0.003228 |
| OTU26  | "d: Bacteria(1.0000),p: Tenericutes(0.4731),c: Mollicutes(0.2113),o: Anaeroplasmatales(0.0945),f: Anaeroplasmataceae(0.0296),g: Asteroleplasma(0.0094);"            | -1.85377 | 0.000655 | 0.003439 |
| OTU97  | "d: Bacteria(1.0000),p: Firmicutes(0.9998),c: Clostridia(0.9814),o: Clostridiales(0.9715),f: Lachnospiraceae(0.9026),g: Clostridium_XIVa(0.8158);"                  | 1.322178 | 0.000761 | 0.003876 |
| OTU104 | "d: Bacteria(1.0000),p: Firmicutes(0.5785),c: Clostridia(0.2725),o: Clostridiales(0.1218),f: Ruminococcaceae(0.0218),g: Intestinimonas(0.0060);"                    | 1.499128 | 0.001313 | 0.00649  |
| OTU100 | "d: Bacteria(1.0000),p: Firmicutes(0.9946),c: Clostridia(0.9115),o: Clostridiales(0.8057),f: Ruminococcaceae(0.3872),g: Papillibacter(0.0523);"                     | 0.782397 | 0.001519 | 0.007289 |
| OTU50  | "d: Bacteria(1.0000),p: Actinobacteria(1.0000),c: Actinobacteria(1.0000),o: Bifidobacteriales(0.9966),f: Bifidobacteriaceae(0.9970),g: Bifidobacterium(0.9871);"    | -1.9292  | 0.001634 | 0.007626 |
| OTU146 | "d: Bacteria(1.0000),p: Firmicutes(0.7911),c: Negativicutes(0.2725),o: Selenomonadales(0.1218),f: Veillonellaceae(0.0454),g: Dendrosporobacter(0.0119);"            | -0.96379 | 0.002191 | 0.009949 |

**Table S4. Unpaired t-tests comparing GI microbiota diversity between Bale monkey populations**

| Comparison          | Metric          | P-value |
|---------------------|-----------------|---------|
| Afursa vs. Kokosa   | Shannon entropy | 0.241   |
| Afursa vs. Odobullu | Shannon entropy | 0.055   |
| Kokosa vs Odobullu  | Shannon entropy | 0.001   |
| Afursa vs. Kokosa   | #OTUs           | <0.001  |
| Afursa vs. Odobullu | #OTUs           | 0.647   |
| Kokosa vs Odobullu  | #OTUs           | 0.003   |
| Afursa vs. Kokosa   | Chao1           | 0.052   |
| Afursa vs. Odobullu | Chao1           | 0.09    |
| Kokosa vs Odobullu  | Chao1           | 0.114   |

**Table S5. Results from exact tests showing OTUs with significantly different occurrence in the wet relative to the dry season in Afursa, including full taxonomic assignment, log-fold difference in abundance (logFC), test p-value and false discovery rate (FDR).**

| OTU#   | Taxonomy                                                                                                                                                            | logFC    | PValue   | FDR      |
|--------|---------------------------------------------------------------------------------------------------------------------------------------------------------------------|----------|----------|----------|
| OTU132 | "d: Bacteria(1.0000),p: Firmicutes(0.8620),c: Clostridia(0.6471),o: Clostridiales(0.3394),f: Clostridiaceae_2(0.0668),g: Alkaliphilus(0.0143);"                     | 2.982014 | 2.07E-10 | 3.70E-08 |
| OTU228 | "d: Bacteria(1.0000),p: Firmicutes(0.9987),c: Clostridia(0.9522),o: Clostridiales(0.8897),f: Lachnospiraceae(0.7302),g: Anaerostipes(0.5751);"                      | -2.53138 | 8.65E-09 | 7.75E-07 |
| OTU900 | "d: Bacteria(1.0000),p: Firmicutes(0.9998),c: Clostridia(0.9981),o: Clostridiales(0.9956),f: Ruminococcaceae(0.9898),g: Faecalibacterium(0.8158);"                  | -1.67758 | 1.67E-07 | 9.97E-06 |
| OTU201 | "d: Bacteria(1.0000),p: Firmicutes(0.8384),c: Clostridia(0.5845),o: Clostridiales(0.3031),f: Ruminococcaceae(0.1311),g: Ruminococcus(0.0191);"                      | 1.629095 | 5.40E-06 | 0.000242 |
| OTU131 | "d: Bacteria(1.0000),p: Firmicutes(0.9987),c: Clostridia(0.9950),o: Clostridiales(0.9960),f: Ruminococcaceae(0.9919),g: Faecalibacterium(0.9701);"                  | -1.30778 | 1.26E-05 | 0.00045  |
| OTU439 | "d: Bacteria(1.0000),p: Bacteroidetes(1.0000),c: Bacteroidia(1.0000),o: Bacteroidales(1.0000),f: Bacteroidaceae(0.9929),g: Bacteroides(0.9968);"                    | 1.58799  | 2.21E-05 | 0.00066  |
| OTU7   | "d: Bacteria(1.0000),p: Firmicutes(0.9991),c: Clostridia(0.9964),o: Clostridiales(0.9975),f: Ruminococcaceae(0.9973),g: Faecalibacterium(0.9829);"                  | -1.06418 | 5.62E-05 | 0.001437 |
| OTU61  | "d: Bacteria(1.0000),p: Proteobacteria(0.4731),c: Deltaproteobacteria(0.2113),o: Bdellovibrionales(0.0945),f: Bdellovibrionaceae(0.0296),g: Vampirovibrio(0.0094);" | 1.51765  | 9.05E-05 | 0.001852 |
| OTU30  | "d: Bacteria(1.0000),p: Firmicutes(0.9992),c: Erysipelotrichia(0.9595),o: Erysipelotrichales(0.9177),f: Erysipelotrichaceae(0.8861),g: Clostridium_XVIII(0.3760);"  | -1.19747 | 9.31E-05 | 0.001852 |
| OTU193 | "d: Bacteria(1.0000),p: Firmicutes(0.9998),c: Clostridia(0.9939),o: Clostridiales(0.9947),f: Lachnospiraceae(0.9274),g: Blautia(0.7814);"                           | -0.96393 | 0.000107 | 0.001913 |
| OTU129 | "d: Bacteria(1.0000),p: Firmicutes(0.7674),c: Clostridia(0.3967),o: Clostridiales(0.1942),f: Clostridiaceae_3(0.0668),g: Brassicibacter(0.0143);"                   | 1.536502 | 0.000155 | 0.00246  |
| OTU136 | "d: Bacteria(1.0000),p: Tenericutes(0.2622),c: Mollicutes(0.0888),o: Entomoplasmatales(0.0400),f: Spiroplasmataceae(0.0140),g: Spiroplasma(0.0060);"                | 1.567613 | 0.000165 | 0.00246  |
| OTU237 | "d: Bacteria(1.0000),p: Tenericutes(0.7674),c: Mollicutes(0.3967),o: Entomoplasmatales(0.1942),f: Spiroplasmataceae(0.0883),g: Spiroplasma(0.0167);"                | 1.331023 | 0.000246 | 0.003393 |
| OTU178 | "d: Bacteria(1.0000),p: Firmicutes(0.9998),c: Clostridia(0.9559),o: Clostridiales(0.9037),f: Lachnospiraceae(0.8778),g: Lachnospiraceae_incertae_sedis(0.7126);"    | -1.31597 | 0.000297 | 0.003792 |
| OTU73  | "d: Bacteria(1.0000),p: Proteobacteria(0.7674),c: Alphaproteobacteria(0.2113),o: Kiloniellales(0.0400),f: Kiloniellaceae(0.0140),g: Kiloniella(0.0060);"            | -2.19012 | 0.000485 | 0.005783 |
| OTU520 | "d: Bacteria(1.0000),p: Firmicutes(0.7911),c: Clostridia(0.4593),o: Clostridiales(0.2305),f: Clostridiaceae_1(0.0668),g: Clostridium_sensu_stricto(0.0143);"        | 1.113974 | 0.000562 | 0.00629  |
| OTU255 | "d: Bacteria(1.0000),p: Firmicutes(0.9990),c: Clostridia(0.9668),o: Clostridiales(0.9457),f: Ruminococcaceae(0.8425),g: Ruminococcus(0.6438);"                      | -1.47491 | 0.000607 | 0.006387 |
| OTU147 | "d: Bacteria(1.0000),p: Firmicutes(0.9988),c: Clostridia(0.9559),o: Clostridiales(0.9037),f: Lachnospiraceae(0.7302),g: Clostridium_XIVa(0.4804);"                  | 1.277595 | 0.000993 | 0.009876 |



**Table S6. Results from exact tests showing OTUs with significantly different occurrence in the wet relative to the dry season in Kokosa, including full taxonomic assignment, log-fold difference in abundance (logFC), test p-value and false discovery rate (FDR).**

| OTU#    | Taxonomy                                                                                                                                                                         | logFC    | PValue   | FDR      |
|---------|----------------------------------------------------------------------------------------------------------------------------------------------------------------------------------|----------|----------|----------|
| OTU107  | "d: Bacteria(1.0000),p: Firmicutes(0.9983),c: Clostridia(0.9924),o: Clostridiales(0.9799),f: Lachnospiraceae(0.9191),g: Anaerostipes(0.8846);"                                   | -5.36778 | 5.73E-22 | 9.23E-20 |
| OTU38   | "d: Bacteria(1.0000),p: Firmicutes(0.9984),c: Negativicutes(0.9935),o: Selenomonadales(0.9904),f: Veillonellaceae(0.9867),g: Dialister(0.9701);"                                 | -3.52886 | 3.85E-13 | 3.10E-11 |
| OTU58   | "d: Bacteria(1.0000),p: Firmicutes(1.0000),c: Clostridia(0.9961),o: Clostridiales(0.9970),f: Lachnospiraceae(0.9878),g: Blautia(0.9743);"                                        | -2.6896  | 1.14E-11 | 6.11E-10 |
| OTU108  | "d: Bacteria(1.0000),p: Firmicutes(0.9992),c: Clostridia(0.9486),o: Clostridiales(0.8757),f: Ruminococcaceae(0.6553),g: Papillibacter(0.1150);"                                  | -2.97752 | 2.00E-10 | 6.91E-09 |
| OTU69   | "d: Bacteria(1.0000),p: Firmicutes(0.9991),c: Clostridia(0.9668),o: Clostridiales(0.9457),f: Ruminococcaceae(0.4677),g: Butyricicoccus(0.2194);"                                 | -3.37911 | 2.15E-10 | 6.91E-09 |
| OTU13   | "d: Archaea(1.0000),p: Euryarchaeota(0.9938),c: Thermoplasmata(0.8654),o: Methanomassiliicoccales(0.4658),f: Methanomassiliicoccaceae(0.3068),g: Methanomassiliicoccus(0.0751);" | 2.53461  | 5.12E-10 | 1.37E-08 |
| OTU30   | "d: Bacteria(1.0000),p: Firmicutes(0.9992),c: Erysipelotrichia(0.9595),o: Erysipelotrichales(0.9177),f: Erysipelotrichaceae(0.8861),g: Clostridium_XVIII(0.3760);"               | -3.29676 | 9.84E-10 | 2.26E-08 |
| OTU193  | "d: Bacteria(1.0000),p: Firmicutes(0.9998),c: Clostridia(0.9939),o: Clostridiales(0.9947),f: Lachnospiraceae(0.9274),g: Blautia(0.7814);"                                        | -2.3011  | 1.30E-09 | 2.61E-08 |
| OTU130  | "d: Bacteria(1.0000),p: Firmicutes(0.9984),c: Clostridia(0.9814),o: Clostridiales(0.9715),f: Lachnospiraceae(0.9357),g: Lachnospiraceae_incertae_sedis(0.9189);"                 | -2.57611 | 1.99E-09 | 3.57E-08 |
| OTU109  | "d: Bacteria(1.0000),p: Firmicutes(1.0000),c: Clostridia(0.9941),o: Clostridiales(0.9952),f: Lachnospiraceae(0.9837),g: Dorea(0.9701);"                                          | -2.51858 | 3.03E-09 | 4.88E-08 |
| OTU187  | "d: Bacteria(1.0000),p: Firmicutes(0.9988),c: Clostridia(0.9948),o: Clostridiales(0.9958),f: Lachnospiraceae(0.9908),g: Coprococcus(0.9871);"                                    | -2.83913 | 5.15E-09 | 7.02E-08 |
| OTU61   | "d: Bacteria(1.0000),p: Proteobacteria(0.4731),c: Deltaproteobacteria(0.2113),o: Bdellovibrionales(0.0945),f: Bdellovibrionaceae(0.0296),g: Vampirovibrio(0.0094);"              | 3.041131 | 5.24E-09 | 7.02E-08 |
| OTU118  | "d: Bacteria(1.0000),p: Firmicutes(0.9999),c: Clostridia(0.9990),o: Clostridiales(0.9994),f: Ruminococcaceae(0.9992),g: Subdoligranulum(0.6438);"                                | -2.20724 | 6.28E-09 | 7.77E-08 |
| OTU166  | "d: Bacteria(1.0000),p: Firmicutes(1.0000),c: Clostridia(0.9958),o: Clostridiales(0.9968),f: Lachnospiraceae(0.9770),g: Blautia(0.9743);"                                        | -2.34775 | 1.02E-08 | 1.17E-07 |
| OTU154  | "d: Bacteria(1.0000),p: Firmicutes(0.2622),c: Clostridia(0.0888),o: Clostridiales(0.0400),f: Clostridiales_Incertae_Sedis_XII(0.0140),g: Guggenheimella(0.0060);"                | -2.66663 | 1.72E-08 | 1.85E-07 |
| OTU23   | "d: Bacteria(1.0000),p: Bacteroidetes(0.9996),c: Bacteroidia(0.9974),o: Bacteroidales(0.9986),f: Prevotellaceae(0.9687),g: Prevotella(0.9722);"                                  | -2.40044 | 5.90E-08 | 5.89E-07 |
| OTU139  | "d: Bacteria(1.0000),p: Firmicutes(0.9899),c: Clostridia(0.8654),o: Clostridiales(0.5099),f: Ruminococcaceae(0.3470),g: Intestinimonas(0.0523);"                                 | 2.345301 | 6.22E-08 | 5.89E-07 |
| OTU91   | "d: Bacteria(1.0000),p: Firmicutes(0.9946),c: Clostridia(0.5845),o: Clostridiales(0.3031),f: Clostridiaceae_1(0.1525),g: Anaerospobacter(0.0295);"                               | -2.06677 | 7.08E-08 | 6.33E-07 |
| OTU8    | "d: Bacteria(1.0000),p: Bacteroidetes(0.9899),c: Sphingobacteriia(0.3342),o: Sphingobacteriales(0.1579),f: Sphingobacteriaceae(0.0668),g: Mucilagibacter(0.0143);"               | 2.878031 | 8.64E-08 | 7.32E-07 |
| OTU230  | "d: Bacteria(1.0000),p: Firmicutes(0.9998),c: Clostridia(0.9933),o: Clostridiales(0.9883),f: Lachnospiraceae(0.9109),g: Blautia(0.6438);"                                        | -1.7607  | 9.39E-08 | 7.56E-07 |
| OTU36   | "d: Bacteria(1.0000),p: Bacteroidetes(0.9995),c: Bacteroidia(0.9973),o: Bacteroidales(0.9985),f: Prevotellaceae(0.9687),g: Prevotella(0.9722);"                                  | -1.94797 | 2.08E-06 | 1.60E-05 |
| OTU374  | "d: Bacteria(1.0000),p: Bacteroidetes(0.9999),c: Bacteroidia(0.9988),o: Bacteroidales(0.9993),f: Prevotellaceae(0.9898),g: Prevotella(0.9914);"                                  | -2.24043 | 2.36E-06 | 1.73E-05 |
| OTU900  | "d: Bacteria(1.0000),p: Firmicutes(0.9998),c: Clostridia(0.9981),o: Clostridiales(0.9956),f: Ruminococcaceae(0.9898),g: Faecalibacterium(0.8158);"                               | -1.95963 | 3.66E-06 | 2.56E-05 |
| OTU21   | "d: Bacteria(1.0000),p: Proteobacteria(0.9987),c: Betaproteobacteria(0.9115),o: Rhodocyclales(0.5981),f: Rhodocyclaceae(0.4275),g: Denitratisoma(0.1672);"                       | 1.635134 | 6.05E-06 | 4.06E-05 |
| OTU3    | "d: Bacteria(1.0000),p: Bacteroidetes(0.9914),c: Bacteroidia(0.6471),o: Bacteroidales(0.3394),f: Porphyromonadaceae(0.1525),g: Paludibacter(0.0215);"                            | 1.747607 | 8.55E-06 | 5.51E-05 |
| OTU7    | "d: Bacteria(1.0000),p: Firmicutes(0.9991),c: Clostridia(0.9964),o: Clostridiales(0.9975),f: Ruminococcaceae(0.9973),g: Faecalibacterium(0.9829);"                               | -1.39752 | 1.36E-05 | 8.45E-05 |
| OTU146  | "d: Bacteria(1.0000),p: Firmicutes(0.7911),c: Negativicutes(0.2725),o: Selenomonadales(0.1218),f: Veillonellaceae(0.0454),g: Dendrosporobacter(0.0119);"                         | -1.71168 | 1.47E-05 | 8.77E-05 |
| OTU34   | "d: Bacteria(1.0000),p: Proteobacteria(1.0000),c: Epsilonproteobacteria(1.0000),o: Campylobacteriales(1.0000),f: Helicobacteraceae(0.9973),g: Helicobacter(0.9968);"             | -2.04445 | 2.01E-05 | 0.000116 |
| OTU83   | "d: Bacteria(1.0000),p: Bacteroidetes(0.8857),c: Flavobacteriia(0.2113),o: Flavobacteriales(0.0945),f: Flavobacteriaceae(0.0296),g: Riemerella(0.0094);"                         | 2.367879 | 2.73E-05 | 0.000149 |
| OTU5    | "d: Bacteria(1.0000),p: Bacteroidetes(0.9988),c: Bacteroidia(0.9886),o: Bacteroidales(0.9757),f: Prevotellaceae(0.5055),g: Prevotella(0.1672);"                                  | 1.978324 | 2.78E-05 | 0.000149 |
| OTU56   | "d: Bacteria(1.0000),p: Bacteroidetes(0.9930),c: Bacteroidia(0.8348),o: Bacteroidales(0.4658),f: Porphyromonadaceae(0.3068),g: Parabacteroides(0.0215);"                         | 1.935771 | 4.76E-05 | 0.000247 |
| OTU263  | "d: Bacteria(1.0000),p: Firmicutes(0.6840),c: Clostridia(0.3342),o: Clostridiales(0.1579),f: Clostridiaceae_4(0.0296),g: Thermotalea(0.0094);"                                   | 1.8969   | 0.000139 | 0.000687 |
| OTU155  | "d: Bacteria(1.0000),p: Firmicutes(0.9899),c: Clostridia(0.8654),o: Clostridiales(0.4216),f: Ruminococcaceae(0.2263),g: Intestinimonas(0.0409);"                                 | 1.71576  | 0.000141 | 0.000687 |
| OTU18   | "d: Bacteria(1.0000),p: Proteobacteria(0.9329),c: Alphaproteobacteria(0.5845),o: Kiloniellales(0.1942),f: Kiloniellaceae(0.0883),g: Kiloniella(0.0167);"                         | 1.789523 | 0.000158 | 0.000734 |
| OTU98   | "d: Bacteria(1.0000),p: Firmicutes(0.7674),c: Clostridia(0.2725),o: Clostridiales(0.1218),f: Lachnospiraceae(0.0454),g: Anaerostipes(0.0119);"                                   | 1.145138 | 0.000159 | 0.000734 |
| OTU86   | "d: Bacteria(1.0000),p: Proteobacteria(0.5785),c: Deltaproteobacteria(0.2725),o: Bdellovibrionales(0.0945),f: Bdellovibrionaceae(0.0296),g: Vampirovibrio(0.0094);"              | 2.001259 | 0.000195 | 0.00087  |
| OTU2    | "d: Bacteria(1.0000),p: Firmicutes(0.9987),c: Clostridia(0.9943),o: Clostridiales(0.9954),f: Clostridiaceae_1(0.8778),g: Clostridium_sensu_stricto(0.7126);"                     | -2.35865 | 0.000228 | 0.000993 |
| OTU25   | "d: Bacteria(1.0000),p: Proteobacteria(0.3677),c: Deltaproteobacteria(0.1500),o: Bdellovibrionales(0.0673),f: Bdellovibrionaceae(0.0218),g: Vampirovibrio(0.0077);"              | -2.07747 | 0.000254 | 0.001076 |
| OTU87   | "d: Bacteria(1.0000),p: Bacteroidetes(0.9922),c: Bacteroidia(0.8348),o: Bacteroidales(0.4658),f: Porphyromonadaceae(0.3068),g: Barnesiella(0.0215);"                             | 1.327237 | 0.00028  | 0.001155 |
| OTU14   | "d: Bacteria(1.0000),p: Firmicutes(0.6840),c: Clostridia(0.3342),o: Clostridiales(0.1579),f: Clostridiaceae_4(0.0296),g: Thermotalea(0.0094);"                                   | -2.18178 | 0.00037  | 0.001489 |
| OTU312  | "d: Bacteria(1.0000),p: Firmicutes(0.8620),c: Clostridia(0.6471),o: Clostridiales(0.3394),f: Clostridiaceae_2(0.0883),g: Alkaliphilus(0.0167);"                                  | -1.31818 | 0.000408 | 0.001603 |
| OTU66   | "d: Bacteria(1.0000),p: Actinobacteria(0.2622),c: Actinobacteria(0.0888),o: Actinomycetales(0.0400),f: Nocardiaceae(0.0140),g: Rhodococcus(0.0060);"                             | -2.11433 | 0.000497 | 0.001906 |
| OTU1219 | "d: Bacteria(1.0000),p: Proteobacteria(0.5785),c: Deltaproteobacteria(0.2725),o: Bdellovibrionales(0.1218),f: Bdellovibrionaceae(0.0454),g: Vampirovibrio(0.0119);"              | 1.892635 | 0.000826 | 0.003094 |
| OTU116  | "d: Bacteria(1.0000),p: Firmicutes(1.0000),c: Clostridia(0.9950),o: Clostridiales(0.9960),f: Lachnospiraceae(0.9888),g: Roseburia(0.9786);"                                      | -1.21086 | 0.000907 | 0.003317 |
| OTU168  | "d: Bacteria(1.0000),p: Bacteroidetes(0.9566),c: Bacteroidia(0.5219),o: Bacteroidales(0.2668),f: Porphyromonadaceae(0.1311),g: Barnesiella(0.0143);"                             | -1.5393  | 0.001251 | 0.004477 |
| OTU428  | "d: Bacteria(1.0000),p: Firmicutes(0.9899),c: Clostridia(0.7723),o: Clostridiales(0.4216),f: Clostridiaceae_1(0.1311),g: Clostridium_sensu_stricto(0.0215);"                     | -1.29008 | 0.001457 | 0.0051   |
| OTU128  | "d: Bacteria(1.0000),p: Bacteroidetes(0.9984),c: Bacteroidia(0.9937),o: Bacteroidales(0.9926),f: Prevotellaceae(0.6553),g: Prevotella(0.3760);"                                  | -1.5948  | 0.001638 | 0.00561  |

**Table S7. Results from exact tests showing OTUs with significantly different occurrence in the wet relative to the dry season in Odobullu, including full taxonomic assignment, log-fold difference in abundance (logFC), test p-value and false discovery rate (FDR).**

| OTU#   | Taxonomy                                                                                                                                                              | logFC    | PValue   | FDR      |
|--------|-----------------------------------------------------------------------------------------------------------------------------------------------------------------------|----------|----------|----------|
| OTU409 | "d: Bacteria(1.0000),p: Firmicutes(0.9978),c: Bacilli(0.8348),o: Lactobacillales(0.4658),f: Lactobacillaceae(0.3068),g: Lactobacillus(0.0751);"                       | -6.75492 | 4.35E-11 | 7.75E-09 |
| OTU478 | "d: Bacteria(1.0000),p: Firmicutes(0.9987),c: Clostridia(0.9922),o: Clostridiales(0.9778),f: Lachnospiraceae(0.9191),g: Clostridium_XIVb(0.7126);"                    | -2.80529 | 4.23E-06 | 0.000256 |
| OTU47  | "d: Bacteria(1.0000),p: Firmicutes(0.9566),c: Clostridia(0.8470),o: Clostridiales(0.5099),f: Ruminococcaceae(0.2263),g: Clostridium_IV(0.0167);"                      | 2.822137 | 4.32E-06 | 0.000256 |
| OTU111 | "d: Bacteria(1.0000),p: Firmicutes(0.9998),c: Clostridia(0.9922),o: Clostridiales(0.9778),f: Lachnospiraceae(0.8943),g: Clostridium_XIVa(0.6095);"                    | -2.4589  | 6.72E-06 | 0.000299 |
| OTU363 | "d: Bacteria(1.0000),p: Firmicutes(0.9998),c: Clostridia(0.9850),o: Clostridiales(0.9736),f: Lachnospiraceae(0.8778),g: Clostridium_XIVa(0.7126);"                    | -3.5429  | 1.52E-05 | 0.000542 |
| OTU179 | "d: Bacteria(1.0000),p: Firmicutes(0.9962),c: Clostridia(0.9023),o: Clostridiales(0.7746),f: Ruminococcaceae(0.5055),g: Sporobacter(0.0751);"                         | -2.14578 | 2.07E-05 | 0.000615 |
| OTU51  | "d: Bacteria(1.0000),p: Bacteroidetes(0.9988),c: Bacteroidia(0.9922),o: Bacteroidales(0.9778),f: Prevotellaceae(0.4677),g: Prevotella(0.0523);"                       | 2.142334 | 3.92E-05 | 0.000996 |
| OTU153 | "d: Bacteria(1.0000),p: Firmicutes(0.9989),c: Clostridia(0.9486),o: Clostridiales(0.8757),f: Lachnospiraceae(0.8051),g: Lachnospiraceae_incertae_sedis(0.5751);"      | -2.77271 | 5.10E-05 | 0.001134 |
| OTU48  | "d: Bacteria(1.0000),p: Actinobacteria(1.0000),c: Actinobacteria(1.0000),o: Actinomycetales(1.0000),f: Micrococcaceae(0.9867),g: Arthrobacter(0.8846);"               | -3.80688 | 6.08E-05 | 0.001203 |
| OTU97  | "d: Bacteria(1.0000),p: Firmicutes(0.9998),c: Clostridia(0.9814),o: Clostridiales(0.9715),f: Lachnospiraceae(0.9026),g: Clostridium_XIVa(0.8158);"                    | -2.97556 | 7.94E-05 | 0.001414 |
| OTU150 | "d: Bacteria(1.0000),p: Firmicutes(0.9970),c: Clostridia(0.9391),o: Clostridiales(0.8477),f: Ruminococcaceae(0.5804),g: Ruminococcus(0.3238);"                        | -3.0826  | 8.94E-05 | 0.001446 |
| OTU87  | "d: Bacteria(1.0000),p: Bacteroidetes(0.9922),c: Bacteroidia(0.8348),o: Bacteroidales(0.4658),f: Porphyromonadaceae(0.3068),g: Barnesiella(0.0215);"                  | 2.079264 | 0.000145 | 0.002147 |
| OTU170 | "d: Bacteria(1.0000),p: Proteobacteria(0.6840),c: Alphaproteobacteria(0.3342),o: Rhodospirillales(0.1218),f: Rhodospirillaceae(0.0454),g: Insolitospirillum(0.0043);" | -2.94798 | 0.000442 | 0.005874 |
| OTU123 | "d: Bacteria(1.0000),p: Firmicutes(0.9914),c: Clostridia(0.8746),o: Clostridiales(0.5540),f: Ruminococcaceae(0.3068),g: Pseudoflavonifractor(0.0215);"                | 2.324612 | 0.000462 | 0.005874 |

**Table S8. Results from exact tests showing OTUs with significantly different occurrence in grivets/vervets relative to Bale monkeys, including full taxonomic assignment, log-fold difference in abundance (logFC), test p-value and false discovery rate (FDR).**

| OTU#    | Taxonomy                                                                                                                                                         | logFC    | PValue   | FDR      |
|---------|------------------------------------------------------------------------------------------------------------------------------------------------------------------|----------|----------|----------|
| OTU87   | "d: Bacteria(1.0000),p: Bacteroidetes(0.9922),c: Bacteroidia(0.8348),o: Bacteroidales(0.4658),f: Porphyromonadaceae(0.3068),g: Barnesiella(0.0215);"             | -7.55043 | 6.68E-66 | 9.95E-64 |
| OTU5    | "d: Bacteria(1.0000),p: Bacteroidetes(0.9988),c: Bacteroidia(0.9886),o: Bacteroidales(0.9757),f: Prevotellaceae(0.5055),g: Prevotella(0.1672);"                  | -7.92719 | 1.58E-55 | 1.18E-53 |
| OTU12   | "d: Bacteria(1.0000),p: Bacteroidetes(0.9985),c: Bacteroidia(0.9935),o: Bacteroidales(0.9904),f: Prevotellaceae(0.6928),g: Prevotella(0.4804);"                  | -8.27175 | 1.41E-53 | 6.98E-52 |
| OTU2    | "d: Bacteria(1.0000),p: Firmicutes(0.9987),c: Clostridia(0.9943),o: Clostridiales(0.9954),f: Clostridiaceae_1(0.8778),g: Clostridium_sensu_stricto(0.7126);"     | -7.19974 | 3.87E-41 | 1.44E-39 |
| OTU165  | "d: Bacteria(1.0000),p: Bacteroidetes(0.9994),c: Bacteroidia(0.9969),o: Bacteroidales(0.9981),f: Prevotellaceae(0.9770),g: Prevotella(0.9189);"                  | -5.42909 | 1.02E-33 | 3.03E-32 |
| OTU109  | "d: Bacteria(1.0000),p: Firmicutes(1.0000),c: Clostridia(0.9941),o: Clostridiales(0.9952),f: Lachnospiraceae(0.9837),g: Dorea(0.9701);"                          | 2.474253 | 1.94E-32 | 4.81E-31 |
| OTU485  | "d: Bacteria(1.0000),p: Firmicutes(0.9991),c: Clostridia(0.9559),o: Clostridiales(0.9037),f: Lachnospiraceae(0.6928),g: Clostridium_XIVa(0.3760);"               | 1.815132 | 3.35E-28 | 7.14E-27 |
| OTU79   | "d: Bacteria(1.0000),p: Firmicutes(0.9914),c: Clostridia(0.8562),o: Clostridiales(0.5540),f: Ruminococcaceae(0.2263),g: Papillibacter(0.0295);"                  | 1.921816 | 1.56E-27 | 2.91E-26 |
| OTU247  | "d: Bacteria(1.0000),p: Firmicutes(0.6840),c: Clostridia(0.2113),o: Clostridiales(0.0945),f: Lachnospiraceae(0.0296),g: Clostridium_XIVa(0.0077);"               | -4.50795 | 3.54E-26 | 5.86E-25 |
| OTU58   | "d: Bacteria(1.0000),p: Firmicutes(1.0000),c: Clostridia(0.9961),o: Clostridiales(0.9970),f: Lachnospiraceae(0.9878),g: Blautia(0.9743);"                        | 2.321721 | 1.75E-25 | 2.61E-24 |
| OTU193  | "d: Bacteria(1.0000),p: Firmicutes(0.9998),c: Clostridia(0.9939),o: Clostridiales(0.9947),f: Lachnospiraceae(0.9274),g: Blautia(0.7814);"                        | 1.935297 | 7.50E-22 | 1.02E-20 |
| OTU2828 | "d: Bacteria(1.0000),p: Firmicutes(0.9984),c: Clostridia(0.9937),o: Clostridiales(0.9926),f: Ruminococcaceae(0.9847),g: Faecalibacterium(0.8158);"               | 1.901137 | 1.17E-21 | 1.46E-20 |
| OTU106  | "d: Bacteria(1.0000),p: Firmicutes(0.8620),c: Clostridia(0.6471),o: Clostridiales(0.3394),f: Ruminococcaceae(0.1097),g: Ruminococcus(0.0143);"                   | -3.72733 | 2.04E-21 | 2.33E-20 |
| OTU38   | "d: Bacteria(1.0000),p: Firmicutes(0.9984),c: Negativicutes(0.9935),o: Selenomonadales(0.9904),f: Veillonellaceae(0.9867),g: Dialister(0.9701);"                 | 4.160084 | 3.37E-21 | 3.58E-20 |
| OTU116  | "d: Bacteria(1.0000),p: Firmicutes(1.0000),c: Clostridia(0.9950),o: Clostridiales(0.9960),f: Lachnospiraceae(0.9888),g: Roseburia(0.9786);"                      | 1.988125 | 1.29E-20 | 1.28E-19 |
| OTU23   | "d: Bacteria(1.0000),p: Bacteroidetes(0.9996),c: Bacteroidia(0.9974),o: Bacteroidales(0.9986),f: Prevotellaceae(0.9687),g: Prevotella(0.9722);"                  | 2.053714 | 1.32E-19 | 1.23E-18 |
| OTU21   | "d: Bacteria(1.0000),p: Proteobacteria(0.9987),c: Betaproteobacteria(0.9115),o: Rhodocyclales(0.5981),f: Rhodocyclaceae(0.4275),g: Denitratisoma(0.1672);"       | 2.40201  | 2.87E-19 | 2.52E-18 |
| OTU63   | "d: Bacteria(1.0000),p: Firmicutes(0.5785),c: Clostridia(0.0888),o: Clostridiales(0.0400),f: Lachnospiraceae(0.0061),g: Lachnospira(0.0043);"                    | -4.74902 | 4.54E-19 | 3.76E-18 |
| OTU50   | "d: Bacteria(1.0000),p: Actinobacteria(1.0000),c: Actinobacteria(1.0000),o: Bifidobacteriales(0.9966),f: Bifidobacteriaceae(0.9970),g: Bifidobacterium(0.9871);" | 2.961455 | 1.25E-18 | 9.82E-18 |
| OTU143  | "d: Bacteria(1.0000),p: Firmicutes(0.9994),c: Clostridia(0.9704),o: Clostridiales(0.9597),f: Lachnospiraceae(0.8051),g: Clostridium_XIVa(0.6095);"               | 1.929327 | 1.95E-18 | 1.45E-17 |
| OTU62   | "d: Bacteria(1.0000),p: Bacteroidetes(0.9329),c: Bacteroidia(0.8348),o: Bacteroidales(0.4658),f: Prevotellaceae(0.1097),g: Alloprevotella(0.0143);"              | -3.69348 | 7.95E-17 | 5.64E-16 |
| OTU76   | "d: Bacteria(1.0000),p: Firmicutes(0.9996),c: Clostridia(0.9741),o: Clostridiales(0.9672),f: Lachnospiraceae(0.8778),g: Clostridium_XIVa(0.7126);"               | 1.742319 | 9.36E-17 | 6.34E-16 |
| OTU7    | "d: Bacteria(1.0000),p: Firmicutes(0.9991),c: Clostridia(0.9964),o: Clostridiales(0.9975),f: Ruminococcaceae(0.9973),g: Faecalibacterium(0.9829);"               | 1.348277 | 1.29E-16 | 8.37E-16 |
| OTU93   | "d: Bacteria(1.0000),p: Firmicutes(0.9978),c: Clostridia(0.9299),o: Clostridiales(0.8337),f: Ruminococcaceae(0.5430),g: Sporobacter(0.0865);"                    | 1.648018 | 1.60E-16 | 9.96E-16 |
| OTU92   | "d: Bacteria(1.0000),p: Firmicutes(0.9993),c: Clostridia(0.9391),o: Clostridiales(0.8477),f: Ruminococcaceae(0.6553),g: Ruminococcus(0.1672);"                   | -3.15022 | 3.58E-16 | 2.08E-15 |
| OTU166  | "d: Bacteria(1.0000),p: Firmicutes(1.0000),c: Clostridia(0.9958),o: Clostridiales(0.9968),f: Lachnospiraceae(0.9770),g: Blautia(0.9743);"                        | 1.662982 | 3.62E-16 | 2.08E-15 |
| OTU69   | "d: Bacteria(1.0000),p: Firmicutes(0.9991),c: Clostridia(0.9668),o: Clostridiales(0.9457),f: Ruminococcaceae(0.4677),g: Butyricicoccus(0.2194);"                 | 2.54981  | 1.05E-15 | 5.82E-15 |
| OTU118  | "d: Bacteria(1.0000),p: Firmicutes(0.9999),c: Clostridia(0.9990),o: Clostridiales(0.9994),f: Ruminococcaceae(0.9992),g: Subdoligranulum(0.6438);"                | 1.689002 | 1.32E-15 | 7.03E-15 |
| OTU177  | "d: Bacteria(1.0000),p: Firmicutes(0.9986),c: Clostridia(0.9931),o: Clostridiales(0.9841),f: Ruminococcaceae(0.9687),g: Gemmiger(0.4282);"                       | 2.374859 | 3.53E-15 | 1.81E-14 |
| OTU130  | "d: Bacteria(1.0000),p: Firmicutes(0.9984),c: Clostridia(0.9814),o: Clostridiales(0.9715),f: Lachnospiraceae(0.9357),g: Lachnospiraceae_incertae_sedis(0.9189);" | 1.7531   | 4.24E-15 | 2.11E-14 |
| OTU39   | "d: Bacteria(1.0000),p: Firmicutes(0.7674),c: Negativicutes(0.2725),o: Selenomonadales(0.1218),f: Veillonellaceae(0.0454),g: Selenomonas(0.0119);"               | -2.21457 | 8.67E-14 | 4.17E-13 |
| OTU18   | "d: Bacteria(1.0000),p: Proteobacteria(0.9329),c: Alphaproteobacteria(0.5845),o: Kiloniellales(0.1942),f: Kiloniellaceae(0.0883),g: Kiloniella(0.0167);"         | -3.2637  | 8.37E-13 | 3.90E-12 |
| OTU20   | "d: Bacteria(1.0000),p: Tenericutes(0.9954),c: Mollicutes(0.9299),o: Anaeroplasmatales(0.7305),f: Anaeroplasmataceae(0.5430),g: Anaeroplasma(0.3238);"           | -3.53874 | 2.33E-12 | 1.05E-11 |
| OTU67   | "d: Bacteria(1.0000),p: Firmicutes(0.6840),c: Clostridia(0.3342),o: Clostridiales(0.1579),f: Lachnospiraceae(0.0296),g: Coprococcus(0.0077);"                    | -2.0139  | 3.94E-12 | 1.73E-11 |
| OTU32   | "d: Bacteria(1.0000),p: Tenericutes(0.9970),c: Mollicutes(0.9449),o: Anaeroplasmatales(0.8057),f: Anaeroplasmataceae(0.6179),g: Anaeroplasma(0.4282);"           | -3.05316 | 1.81E-11 | 7.69E-11 |
| OTU53   | "d: Bacteria(1.0000),p: Verrucomicrobia(0.8620),c: Subdivision5(0.6471),g: Subdivision5_genera_incertae_sedis(0.0409);"                                          | 2.660803 | 1.89E-11 | 7.81E-11 |
| OTU803  | "d: Bacteria(1.0000),p: Firmicutes(0.9993),c: Clostridia(0.9522),o: Clostridiales(0.8897),f: Ruminococcaceae(0.6928),g: Oscillibacter(0.1672);"                  | 1.311371 | 2.12E-11 | 8.55E-11 |
| OTU66   | "d: Bacteria(1.0000),p: Actinobacteria(0.2622),c: Actinobacteria(0.0888),o: Actinomycetales(0.0400),f: Nocardiaceae(0.0140),g: Rhodococcus(0.0060);"             | 2.341409 | 5.03E-11 | 1.97E-10 |
| OTU47   | "d: Bacteria(1.0000),p: Firmicutes(0.9566),c: Clostridia(0.8470),o: Clostridiales(0.5099),f: Ruminococcaceae(0.2263),g: Clostridium_IV(0.0167);"                 | -1.87224 | 7.02E-11 | 2.68E-10 |
| OTU3166 | "d: Bacteria(1.0000),p: Firmicutes(0.9946),c: Clostridia(0.8654),o: Clostridiales(0.5981),f: Ruminococcaceae(0.2665),g: Sporobacter(0.0523);"                    | 1.131313 | 1.07E-10 | 4.00E-10 |
| OTU55   | "d: Bacteria(1.0000),p: Firmicutes(0.7911),c: Clostridia(0.4593),o: Clostridiales(0.2305),f: Clostridiaceae_1(0.0668),g: Clostridium_sensu_stricto(0.0143);"     | -2.39178 | 2.27E-10 | 8.25E-10 |
| OTU111  | "d: Bacteria(1.0000),p: Firmicutes(0.9998),c: Clostridia(0.9922),o: Clostridiales(0.9778),f: Lachnospiraceae(0.8943),g: Clostridium_XIVa(0.6095);"               | 1.273272 | 5.69E-10 | 2.02E-09 |
| OTU179  | "d: Bacteria(1.0000),p: Firmicutes(0.9962),c: Clostridia(0.9023),o: Clostridiales(0.7746),f: Ruminococcaceae(0.5055),g: Sporobacter(0.0751);"                    | -1.68821 | 1.26E-09 | 4.36E-09 |
| OTU72   | "d: Bacteria(1.0000),p: Firmicutes(0.4731),c: Clostridia(0.2113),o: Clostridiales(0.0673),f: Lachnospiraceae(0.0061),g: Lachnospiraceae_incertae_sedis(0.0043);" | -1.85938 | 1.94E-09 | 6.56E-09 |
| OTU146  | "d: Bacteria(1.0000),p: Firmicutes(0.7911),c: Negativicutes(0.2725),o: Selenomonadales(0.1218),f: Veillonellaceae(0.0454),g: Dendrosporobacter(0.0119);"         | -1.44193 | 2.79E-09 | 9.23E-09 |
| OTU3    | "d: Bacteria(1.0000),p: Bacteroidetes(0.9914),c: Bacteroidia(0.6471),o: Bacteroidales(0.3394),f: Porphyromonadaceae(0.1525),g: Paludibacter(0.0215);"            | 1.637282 | 3.05E-09 | 9.88E-09 |
| OTU223  | "d: Bacteria(1.0000),p: Firmicutes(0.9993),c: Clostridia(0.9299),o: Clostridiales(0.8337),f: Lachnospiraceae(0.5055),g: Clostridium_XIVa(0.0865);"               | 1.076341 | 4.73E-09 | 1.50E-08 |

|         |                                                                                                                                                                     |          |          |          |
|---------|---------------------------------------------------------------------------------------------------------------------------------------------------------------------|----------|----------|----------|
| OTU217  | "d: Bacteria(1.0000),p: Firmicutes(0.3677),c: Clostridia(0.1500),o: Clostridiales(0.0673),f: Ruminococcaceae(0.0140),g: Ruminococcus(0.0060);"                      | -2.60026 | 1.28E-08 | 3.98E-08 |
| OTU188  | "d: Bacteria(1.0000),p: Firmicutes(0.9914),c: Clostridia(0.8746),o: Clostridiales(0.5540),f: Ruminococcaceae(0.2665),g: Intestinimonas(0.0295);"                    | 1.333667 | 3.27E-08 | 9.96E-08 |
| OTU36   | "d: Bacteria(1.0000),p: Bacteroidetes(0.9995),c: Bacteroidia(0.9973),o: Bacteroidales(0.9985),f: Prevotellaceae(0.9687),g: Prevotella(0.9722);"                     | 1.22626  | 3.67E-08 | 1.10E-07 |
| OTU46   | "d: Bacteria(1.0000),p: Firmicutes(0.9914),c: Clostridia(0.8562),o: Clostridiales(0.5540),f: Ruminococcaceae(0.3068),g: Pseudobacteroides(0.0295);"                 | 1.02569  | 9.83E-08 | 2.87E-07 |
| OTU428  | "d: Bacteria(1.0000),p: Firmicutes(0.9899),c: Clostridia(0.7723),o: Clostridiales(0.4216),f: Clostridiaceae_1(0.1311),g: Clostridium_sensu_stricto(0.0215);"        | 1.138146 | 2.41E-07 | 6.91E-07 |
| OTU91   | "d: Bacteria(1.0000),p: Firmicutes(0.9946),c: Clostridia(0.5845),o: Clostridiales(0.3031),f: Clostridiaceae_1(0.1525),g: Anaerospobacter(0.0295);"                  | -1.18845 | 3.16E-07 | 8.89E-07 |
| OTU119  | "d: Bacteria(1.0000),p: Firmicutes(0.9990),c: Clostridia(0.9777),o: Clostridiales(0.9693),f: Ruminococcaceae(0.8943),g: Ruminococcus(0.6438);"                      | -1.74448 | 5.77E-07 | 1.59E-06 |
| OTU31   | "d: Bacteria(1.0000),p: Bacteroidetes(0.9987),c: Bacteroidia(0.9704),o: Bacteroidales(0.9597),f: Rikenellaceae(0.9109),g: Alistipes(0.7814);"                       | -1.43744 | 9.65E-07 | 2.61E-06 |
| OTU1431 | "d: Bacteria(1.0000),p: Firmicutes(0.9994),c: Clostridia(0.9971),o: Clostridiales(0.9983),f: Ruminococcaceae(0.9847),g: Faecalibacterium(0.6782);"                  | 0.968951 | 1.05E-06 | 2.78E-06 |
| OTU322  | "d: Bacteria(1.0000),p: Firmicutes(0.9990),c: Clostridia(0.9956),o: Clostridiales(0.9966),f: Eubacteriaceae(0.9888),g: Eubacterium(0.9914);"                        | 1.296944 | 1.52E-06 | 3.96E-06 |
| OTU164  | "d: Bacteria(1.0000),p: Firmicutes(0.9954),c: Clostridia(0.7097),o: Clostridiales(0.3775),f: Lachnospiraceae(0.1861),g: Syntrophococcus(0.0409);"                   | -1.72156 | 1.73E-06 | 4.43E-06 |
| OTU78   | "d: Bacteria(1.0000),p: Firmicutes(0.6840),c: Clostridia(0.3342),o: Clostridiales(0.1579),f: Peptostreptococcaceae(0.0454),g: Acetoanaerobium(0.0060);"             | -1.8134  | 1.75E-06 | 4.43E-06 |
| OTU27   | "d: Bacteria(1.0000),p: Bacteroidetes(0.9988),c: Bacteroidia(0.9850),o: Bacteroidales(0.9736),f: Prevotellaceae(0.8861),g: Alloprevotella(0.6782);"                 | -1.9834  | 1.90E-06 | 4.73E-06 |
| OTU90   | "d: Bacteria(1.0000),p: Firmicutes(0.9970),c: Clostridia(0.9207),o: Clostridiales(0.8197),f: Eubacteriaceae(0.4275),g: Eubacterium(0.1672);"                        | 1.184428 | 2.22E-06 | 5.42E-06 |
| OTU158  | "d: Bacteria(0.6762),p: Proteobacteria(0.1203),c: Deltaproteobacteria(0.0195),o: Syntrophobacteriales(0.0074),f: Syntrophaceae(0.0020),g: Desulfomonile(0.0020);"   | -1.65293 | 2.25E-06 | 5.42E-06 |
| OTU270  | "d: Bacteria(1.0000),p: Firmicutes(0.8384),c: Clostridia(0.5219),o: Clostridiales(0.2668),f: Ruminococcaceae(0.0296),g: Clostridium_III(0.0094);"                   | 1.020501 | 2.60E-06 | 6.15E-06 |
| OTU49   | "d: Bacteria(1.0000),p: Firmicutes(0.9978),c: Clostridia(0.9391),o: Clostridiales(0.8477),f: Ruminococcaceae(0.6179),g: Oscillibacter(0.0751);"                     | 0.872358 | 2.98E-06 | 6.94E-06 |
| OTU19   | "d: Bacteria(1.0000),p: Bacteroidetes(0.9988),c: Bacteroidia(0.8654),o: Bacteroidales(0.5981),f: Porphyromonadaceae(0.4275),g: Parabacteroides(0.0409);"            | -1.90432 | 4.59E-06 | 1.04E-05 |
| OTU35   | "d: Bacteria(1.0000),p: Firmicutes(0.8620),c: Clostridia(0.6471),o: Clostridiales(0.2668),f: Ruminococcaceae(0.1311),g: Intestinimonas(0.0191);"                    | 1.663946 | 4.61E-06 | 1.04E-05 |
| OTU43   | "d: Bacteria(1.0000),p: Firmicutes(0.8147),c: Clostridia(0.5219),o: Clostridiales(0.2668),f: Ruminococcaceae(0.0668),g: Ruminococcus(0.0094);"                      | -1.79852 | 6.84E-06 | 1.52E-05 |
| OTU41   | "d: Bacteria(1.0000),p: Firmicutes(0.7674),c: Clostridia(0.3967),o: Clostridiales(0.1942),f: Ruminococcaceae(0.0218),g: Intestinimonas(0.0077);"                    | -1.42623 | 8.29E-06 | 1.82E-05 |
| OTU2966 | "d: Bacteria(1.0000),p: Firmicutes(0.9899),c: Clostridia(0.5845),o: Clostridiales(0.3031),f: Ruminococcaceae(0.1525),g: Pseudobacteroides(0.0215);"                 | -0.96919 | 9.64E-06 | 2.08E-05 |
| OTU131  | "d: Bacteria(1.0000),p: Firmicutes(0.9987),c: Clostridia(0.9950),o: Clostridiales(0.9960),f: Ruminococcaceae(0.9919),g: Faecalibacterium(0.9701);"                  | 0.862111 | 1.04E-05 | 2.21E-05 |
| OTU4    | "d: Bacteria(1.0000),p: Spirochaetes(0.7911),c: Spirochaetia(0.4593),o: Spirochaetales(0.2305),f: Spirochaetaceae(0.1097),g: Spirochaeta(0.0094);"                  | -1.58297 | 1.13E-05 | 2.37E-05 |
| OTU149  | "d: Bacteria(1.0000),p: Fibrobacteres(0.9985),c: Fibrobacteria(0.9948),o: Fibrobacteriales(0.9958),f: Fibrobacteraceae(0.9929),g: Fibrobacter(0.9968);"             | -1.48993 | 1.40E-05 | 2.90E-05 |
| OTU40   | "d: Bacteria(1.0000),p: Firmicutes(1.0000),c: Clostridia(0.9950),o: Clostridiales(0.9960),f: Lachnospiraceae(0.9888),g: Roseburia(0.9533);"                         | 0.804764 | 8.85E-05 | 0.000181 |
| OTU89   | "d: Bacteria(1.0000),p: Firmicutes(0.5785),c: Clostridia(0.2725),o: Clostridiales(0.1218),f: Ruminococcaceae(0.0218),g: Ruminococcus(0.0077);"                      | -0.83959 | 8.99E-05 | 0.000181 |
| OTU28   | "d: Bacteria(1.0000),p: Proteobacteria(0.8147),c: Alphaproteobacteria(0.3342),o: Kiloniellales(0.0673),f: Kiloniellaceae(0.0218),g: Kiloniella(0.0077);"            | 1.729008 | 0.000114 | 0.000227 |
| OTU73   | "d: Bacteria(1.0000),p: Proteobacteria(0.7674),c: Alphaproteobacteria(0.2113),o: Kiloniellales(0.0400),f: Kiloniellaceae(0.0140),g: Kiloniella(0.0060);"            | 1.424816 | 0.00012  | 0.000236 |
| OTU145  | "d: Bacteria(1.0000),p: Firmicutes(0.5785),c: Erysipelotrichia(0.2113),o: Erysipelotrichales(0.0945),f: Erysipelotrichaceae(0.0296),g: Erysipelothrix(0.0094);"     | 1.269654 | 0.000153 | 0.000296 |
| OTU99   | "d: Bacteria(1.0000),p: Actinobacteria(0.9938),c: Actinobacteria(0.8931),o: Coriobacteriales(0.7305),f: Coriobacteriaceae(0.5430),g: Slackia(0.0751);"              | 1.069212 | 0.000184 | 0.000351 |
| OTU202  | "d: Bacteria(1.0000),p: Firmicutes(0.9899),c: Clostridia(0.8348),o: Clostridiales(0.4658),f: Ruminococcaceae(0.2263),g: Clostridium_III(0.0215);"                   | -0.95072 | 0.000191 | 0.00036  |
| OTU1219 | "d: Bacteria(1.0000),p: Proteobacteria(0.5785),c: Deltaproteobacteria(0.2725),o: Bdellovibrionales(0.1218),f: Bdellovibrionaceae(0.0454),g: Vampirovibrio(0.0119);" | -1.5597  | 0.000219 | 0.000409 |
| OTU835  | "d: Bacteria(1.0000),p: Bacteroidetes(0.9914),c: Bacteroidia(0.5845),o: Bacteroidales(0.3031),f: Porphyromonadaceae(0.1311),g: Paludibacter(0.0215);"               | -1.73913 | 0.000363 | 0.000668 |
| OTU159  | "d: Bacteria(0.9753),p: Bacteroidetes(0.6840),c: Sphingobacteriia(0.0285),o: Sphingobacteriales(0.0111),f: Sphingobacteriaceae(0.0037),g: Parapedobacter(0.0031);"  | 1.301056 | 0.000558 | 0.001014 |
| OTU14   | "d: Bacteria(1.0000),p: Firmicutes(0.6840),c: Clostridia(0.3342),o: Clostridiales(0.1579),f: Clostridiaceae_4(0.0296),g: Thermotalea(0.0094);"                      | -1.43384 | 0.000847 | 0.00152  |
| OTU115  | "d: Bacteria(0.9753),p: Firmicutes(0.1875),c: Clostridia(0.0345),o: Clostridiales(0.0136),f: Clostridiaceae_1(0.0042),g: Caloramator(0.0034);"                      | -1.22151 | 0.001081 | 0.001917 |
| OTU1    | "d: Bacteria(1.0000),p: Firmicutes(1.0000),c: Clostridia(0.9958),o: Clostridiales(0.9968),f: Clostridiaceae_1(0.9857),g: Sarcina(0.9722);"                          | -1.05785 | 0.001604 | 0.002812 |
| OTU113  | "d: Bacteria(1.0000),p: Bacteroidetes(0.9987),c: Bacteroidia(0.9924),o: Bacteroidales(0.9799),f: Prevotellaceae(0.4275),g: Prevotella(0.0637);"                     | -1.24938 | 0.001827 | 0.003166 |
| OTU107  | "d: Bacteria(1.0000),p: Firmicutes(0.9983),c: Clostridia(0.9924),o: Clostridiales(0.9799),f: Lachnospiraceae(0.9191),g: Anaerostipes(0.8846);"                      | 0.920972 | 0.002201 | 0.00377  |
| OTU22   | "d: Bacteria(1.0000),p: Bacteroidetes(0.9922),c: Bacteroidia(0.8348),o: Bacteroidales(0.4658),f: Prevotellaceae(0.1525),g: Paraprevotella(0.0295);"                 | -0.91249 | 0.002274 | 0.00385  |
| OTU102  | "d: Bacteria(1.0000),p: Proteobacteria(0.2622),c: Deltaproteobacteria(0.0888),o: Bdellovibrionales(0.0400),f: Bdellovibrionaceae(0.0140),g: Vampirovibrio(0.0060);" | 0.90778  | 0.002421 | 0.004053 |
| OTU126  | "d: Bacteria(1.0000),p: Firmicutes(0.7911),c: Clostridia(0.4593),o: Clostridiales(0.2305),f: Clostridiaceae_4(0.0296),g: Thermotalea(0.0094);"                      | 0.814249 | 0.002491 | 0.004124 |
| OTU900  | "d: Bacteria(1.0000),p: Firmicutes(0.9998),c: Clostridia(0.9981),o: Clostridiales(0.9956),f: Ruminococcaceae(0.9898),g: Faecalibacterium(0.8158);"                  | 0.665968 | 0.002555 | 0.004184 |
| OTU128  | "d: Bacteria(1.0000),p: Bacteroidetes(0.9984),c: Bacteroidia(0.9937),o: Bacteroidales(0.9926),f: Prevotellaceae(0.6553),g: Prevotella(0.3760);"                     | -1.18638 | 0.003132 | 0.005073 |
| OTU3172 | "d: Bacteria(1.0000),p: Firmicutes(0.9992),c: Clostridia(0.9926),o: Clostridiales(0.9820),f: Ruminococcaceae(0.9357),g: Faecalibacterium(0.5327);"                  | 0.540922 | 0.003508 | 0.00562  |
| OTU45   | "d: Bacteria(0.6389),p: Lentisphaerae(0.0530),c: Lentisphaeria(0.0165),o: Victivallales(0.0062),f: Victivallaceae(0.0015),g: Victivallis(0.0017);"                  | 0.938299 | 0.005721 | 0.009069 |

**Table S9. OTUs whose relative abundances correlate significantly with the number of chloroplast reads classified as Poaceae.**

| OUT#    | Taxonomy                                                                                                                                                       | Correlation | P-value | % Relative abundance |
|---------|----------------------------------------------------------------------------------------------------------------------------------------------------------------|-------------|---------|----------------------|
| OTU101  | d: Bacteria(1.0000),p: Proteobacteria(0.9994),c: Betaproteobacteria(0.9850),o: Burkholderiales(0.9693),f: Sutterellaceae(0.9191),g: Sutterella(0.8846)         | 0.42        | 0.010   | 0.13                 |
| OTU224  | d: Bacteria(0.2356),p: Proteobacteria(0.0162),c: Alphaproteobacteria(0.0098),o: Rhodospirillales(0.0036),f: Acetobacteraceae(0.0005),g: Stella(0.0009)         | 0.63        | <0.001  | 0.17                 |
| OTU225  | d: Bacteria(1.0000),p: Firmicutes(0.9990),c: Clostridia(0.9207),o: Clostridiales(0.8197),f: Lachnospiraceae(0.4677),g: Clostridium_XIVa(0.1672)                | 0.46        | <0.001  | 0.14                 |
| OTU324  | d: Bacteria(1.0000),p: Firmicutes(0.9930),c: Clostridia(0.8562),o: Clostridiales(0.5540),f: Clostridiales_Incertae_Sedis_XIII(0.3068),g: Anaerovorax(0.0751)   | 0.44        | 0.004   | 0.02                 |
| OTU450  | d: Bacteria(1.0000),p: Firmicutes(0.4731),c: Clostridia(0.2113),o: Clostridiales(0.0945),f: Clostridiales_Incertae_Sedis_XII(0.0296),g: Guggenheimella(0.0094) | 0.41        | 0.016   | 0.04                 |
| OTU456  | d: Bacteria(1.0000),p: Firmicutes(0.9986),c: Clostridia(0.9850),o: Clostridiales(0.9736),f: Lachnospiraceae(0.8861),g: Roseburia(0.5751)                       | 0.43        | 0.006   | 0.08                 |
| OTU585  | d: Bacteria(1.0000),p: Firmicutes(0.9991),c: Clostridia(0.9559),o: Clostridiales(0.9037),f: Lachnospiraceae(0.6928),g: Clostridium_XIVa(0.3760)                | 0.42        | 0.007   | 0.12                 |
| OTU925  | d: Bacteria(1.0000),p: Firmicutes(0.9990),c: Clostridia(0.9595),o: Clostridiales(0.9177),f: Lachnospiraceae(0.6553),g: Clostridium_XIVa(0.3238)                | 0.45        | 0.002   | 0.01                 |
| OTU1873 | d: Bacteria(1.0000),p: Firmicutes(0.9993),c: Clostridia(0.8746),o: Clostridiales(0.6422),f: Lachnospiraceae(0.3470),g: Anaerostipes(0.0865)                    | 0.41        | 0.020   | 0.01                 |

**Table S10. Sample overview**

| Species     | Population | Habitat type    | Season | PCR1 Fwd primer | PCR1 Rev primer | PCR2 Rev primer | # reads |
|-------------|------------|-----------------|--------|-----------------|-----------------|-----------------|---------|
| Bale monkey | Afursa     | Forest fragment | Wet    | f1              | r12             | r8              | 176040  |
| Bale monkey | Afursa     | Forest fragment | Wet    | f1              | r15             | r8              | 148340  |
| Bale monkey | Afursa     | Forest fragment | Wet    | f1              | r16             | r8              | 170335  |
| Bale monkey | Afursa     | Forest fragment | Wet    | f1              | r19             | r8              | 55537   |
| Bale monkey | Afursa     | Forest fragment | Wet    | f1              | r22             | r8              | 122032  |
| Bale monkey | Afursa     | Forest fragment | Wet    | f1              | r3              | r8              | 147838  |
| Bale monkey | Afursa     | Forest fragment | Wet    | f1              | r4              | r8              | 169076  |
| Bale monkey | Afursa     | Forest fragment | Dry    | f1              | r7              | r8              | 98070   |
| Bale monkey | Afursa     | Forest fragment | Wet    | f10             | r12             | r8              | 158401  |
| Bale monkey | Afursa     | Forest fragment | Dry    | f10             | r15             | r8              | 154711  |
| Bale monkey | Afursa     | Forest fragment | Wet    | f10             | r16             | r8              | 203879  |
| Bale monkey | Afursa     | Forest fragment | Wet    | f10             | r19             | r8              | 189863  |
| Bale monkey | Afursa     | Forest fragment | Dry    | f10             | r22             | r8              | 144893  |
| Bale monkey | Afursa     | Forest fragment | Wet    | f10             | r3              | r8              | 160245  |
| Bale monkey | Afursa     | Forest fragment | Dry    | f10             | r4              | r8              | 191819  |
| Bale monkey | Afursa     | Forest fragment | Dry    | f10             | r7              | r8              | 210598  |
| Bale monkey | Afursa     | Forest fragment | Wet    | f2              | r12             | r8              | 197771  |
| Bale monkey | Afursa     | Forest fragment | Wet    | f2              | r15             | r8              | 195875  |
| Bale monkey | Afursa     | Forest fragment | Wet    | f2              | r16             | r8              | 197817  |
| Bale monkey | Afursa     | Forest fragment | Wet    | f2              | r19             | r8              | 242609  |
| Bale monkey | Afursa     | Forest fragment | Wet    | f2              | r22             | r8              | 116917  |
| Bale monkey | Afursa     | Forest fragment | Wet    | f2              | r3              | r8              | 99646   |
| Bale monkey | Afursa     | Forest fragment | Wet    | f2              | r4              | r8              | 205900  |
| Bale monkey | Afursa     | Forest fragment | Wet    | f2              | r7              | r8              | 204234  |
| Bale monkey | Afursa     | Forest fragment | Wet    | f4              | r12             | r8              | 99476   |
| Bale monkey | Afursa     | Forest fragment | Wet    | f4              | r15             | r8              | 132708  |
| Bale monkey | Afursa     | Forest fragment | Wet    | f4              | r16             | r8              | 140356  |
| Bale monkey | Afursa     | Forest fragment | Wet    | f4              | r19             | r8              | 92779   |
| Bale monkey | Afursa     | Forest fragment | Wet    | f4              | r22             | r8              | 89497   |
| Bale monkey | Afursa     | Forest fragment | Wet    | f4              | r3              | r8              | 103240  |
| Bale monkey | Afursa     | Forest fragment | Wet    | f4              | r7              | r8              | 90224   |
| Bale monkey | Afursa     | Forest fragment | Dry    | f5              | r12             | r8              | 145189  |
| Bale monkey | Afursa     | Forest fragment | Dry    | f5              | r15             | r8              | 148120  |
| Bale monkey | Afursa     | Forest fragment | Wet    | f5              | r16             | r8              | 183271  |
| Bale monkey | Afursa     | Forest fragment | Dry    | f5              | r19             | r8              | 171777  |
| Bale monkey | Afursa     | Forest fragment | Dry    | f5              | r22             | r8              | 105238  |
| Bale monkey | Afursa     | Forest fragment | Wet    | f5              | r3              | r8              | 162181  |
| Bale monkey | Afursa     | Forest fragment | Dry    | f5              | r4              | r8              | 152297  |
| Bale monkey | Afursa     | Forest fragment | Dry    | f5              | r7              | r8              | 149129  |
| Bale monkey | Afursa     | Forest fragment | Wet    | f6              | r4              | r8              | 186330  |
| Bale monkey | Afursa     | Forest fragment | Dry    | f6              | r7              | r8              | 191101  |
| Bale monkey | Afursa     | Forest fragment | Dry    | f7              | r12             | r8              | 161767  |
| Bale monkey | Afursa     | Forest fragment | Dry    | f7              | r15             | r8              | 159379  |
| Bale monkey | Afursa     | Forest fragment | Dry    | f7              | r16             | r8              | 156692  |
| Bale monkey | Afursa     | Forest fragment | Dry    | f7              | r19             | r8              | 135518  |
| Bale monkey | Afursa     | Forest fragment | Dry    | f7              | r22             | r8              | 156887  |
| Bale monkey | Afursa     | Forest fragment | Dry    | f7              | r3              | r8              | 91829   |
| Bale monkey | Afursa     | Forest fragment | Dry    | f7              | r4              | r8              | 74617   |
| Bale monkey | Afursa     | Forest fragment | Dry    | f8              | r12             | r8              | 194030  |
| Bale monkey | Afursa     | Forest fragment | Dry    | f8              | r16             | r8              | 134240  |
| Bale monkey | Afursa     | Forest fragment | Dry    | f8              | r19             | r8              | 132262  |
| Bale monkey | Afursa     | Forest fragment | Dry    | f8              | r3              | r8              | 87175   |
| Bale monkey | Afursa     | Forest fragment | Dry    | f8              | r4              | r8              | 137499  |
| Bale monkey | Afursa     | Forest fragment | Dry    | f8              | r7              | r8              | 139141  |
| Bale monkey | Afursa     | Forest fragment | Dry    | f2              | r16             | r9              | 60444   |
| Bale monkey | Afursa     | Forest fragment | Dry    | f2              | r19             | r9              | 185696  |
| Bale monkey | Afursa     | Forest fragment | Dry    | f2              | r22             | r9              | 141783  |
| Bale monkey | Afursa     | Forest fragment | Dry    | f4              | r12             | r9              | 85176   |
| Bale monkey | Afursa     | Forest fragment | Dry    | f4              | r15             | r9              | 102107  |
| Bale monkey | Afursa     | Forest fragment | Dry    | f4              | r16             | r9              | 89836   |
| Bale monkey | Afursa     | Forest fragment | Dry    | f4              | r19             | r9              | 112529  |
| Bale monkey | Afursa     | Forest fragment | Dry    | f4              | r22             | r9              | 83428   |
| Bale monkey | Afursa     | Forest fragment | Dry    | f4              | r3              | r9              | 92979   |
| Bale monkey | Afursa     | Forest fragment | Dry    | f4              | r7              | r9              | 89505   |
| Bale monkey | Afursa     | Forest fragment | Dry    | f5              | r3              | r9              | 93889   |
| Bale monkey | Afursa     | Forest fragment | Dry    | f6              | r4              | r9              | 121440  |
| Bale monkey | Kokosa     | Forest fragment | Dry    | f10             | r12             | r9              | 165812  |

|             |          |                  |     |     |     |    |        |
|-------------|----------|------------------|-----|-----|-----|----|--------|
| Bale monkey | Kokosa   | Forest fragment  | Dry | f10 | r15 | r9 | 163081 |
| Bale monkey | Kokosa   | Forest fragment  | Dry | f10 | r16 | r9 | 84495  |
| Bale monkey | Kokosa   | Forest fragment  | Dry | f10 | r19 | r9 | 172657 |
| Bale monkey | Kokosa   | Forest fragment  | Dry | f10 | r22 | r9 | 132667 |
| Bale monkey | Kokosa   | Forest fragment  | Dry | f10 | r3  | r9 | 102676 |
| Bale monkey | Kokosa   | Forest fragment  | Dry | f10 | r4  | r9 | 134016 |
| Bale monkey | Kokosa   | Forest fragment  | Dry | f10 | r7  | r9 | 158581 |
| Bale monkey | Kokosa   | Forest fragment  | Dry | f11 | r12 | r9 | 192877 |
| Bale monkey | Kokosa   | Forest fragment  | Dry | f11 | r15 | r9 | 105987 |
| Bale monkey | Kokosa   | Forest fragment  | Wet | f11 | r19 | r9 | 101434 |
| Bale monkey | Kokosa   | Forest fragment  | Wet | f11 | r22 | r9 | 114592 |
| Bale monkey | Kokosa   | Forest fragment  | Dry | f11 | r3  | r9 | 85795  |
| Bale monkey | Kokosa   | Forest fragment  | Dry | f11 | r4  | r9 | 84034  |
| Bale monkey | Kokosa   | Forest fragment  | Dry | f11 | r7  | r9 | 114815 |
| Bale monkey | Kokosa   | Forest fragment  | Wet | f13 | r12 | r9 | 182997 |
| Bale monkey | Kokosa   | Forest fragment  | Wet | f13 | r15 | r9 | 148375 |
| Bale monkey | Kokosa   | Forest fragment  | Wet | f13 | r16 | r9 | 134372 |
| Bale monkey | Kokosa   | Forest fragment  | Wet | f13 | r19 | r9 | 160718 |
| Bale monkey | Kokosa   | Forest fragment  | Wet | f13 | r22 | r9 | 81295  |
| Bale monkey | Kokosa   | Forest fragment  | Wet | f13 | r3  | r9 | 120502 |
| Bale monkey | Kokosa   | Forest fragment  | Wet | f13 | r4  | r9 | 123492 |
| Bale monkey | Kokosa   | Forest fragment  | Wet | f13 | r7  | r9 | 112237 |
| Bale monkey | Kokosa   | Forest fragment  | Wet | f16 | r12 | r9 | 150836 |
| Bale monkey | Kokosa   | Forest fragment  | Wet | f16 | r15 | r9 | 115191 |
| Bale monkey | Kokosa   | Forest fragment  | Wet | f16 | r19 | r9 | 191063 |
| Bale monkey | Kokosa   | Forest fragment  | Wet | f16 | r3  | r9 | 142630 |
| Bale monkey | Kokosa   | Forest fragment  | Wet | f16 | r4  | r9 | 125921 |
| Bale monkey | Kokosa   | Forest fragment  | Wet | f16 | r7  | r9 | 162574 |
| Bale monkey | Kokosa   | Forest fragment  | Wet | f19 | r12 | r9 | 189199 |
| Bale monkey | Kokosa   | Forest fragment  | Wet | f19 | r15 | r9 | 166788 |
| Bale monkey | Kokosa   | Forest fragment  | Wet | f19 | r16 | r9 | 198949 |
| Bale monkey | Kokosa   | Forest fragment  | Wet | f19 | r22 | r9 | 151453 |
| Bale monkey | Kokosa   | Forest fragment  | Wet | f19 | r3  | r9 | 135794 |
| Bale monkey | Kokosa   | Forest fragment  | Wet | f19 | r4  | r9 | 151500 |
| Bale monkey | Kokosa   | Forest fragment  | Wet | f19 | r7  | r9 | 108163 |
| Bale monkey | Kokosa   | Forest fragment  | Wet | f22 | r12 | r9 | 147180 |
| Bale monkey | Kokosa   | Forest fragment  | Wet | f22 | r15 | r9 | 162107 |
| Bale monkey | Kokosa   | Forest fragment  | Wet | f22 | r3  | r9 | 138706 |
| Bale monkey | Kokosa   | Forest fragment  | Wet | f22 | r4  | r9 | 121914 |
| Bale monkey | Kokosa   | Forest fragment  | Wet | f22 | r7  | r9 | 129637 |
| Bale monkey | Kokosa   | Forest fragment  | Dry | f5  | r12 | r9 | 136242 |
| Bale monkey | Kokosa   | Forest fragment  | Dry | f5  | r15 | r9 | 132521 |
| Bale monkey | Kokosa   | Forest fragment  | Dry | f5  | r16 | r9 | 53268  |
| Bale monkey | Kokosa   | Forest fragment  | Dry | f5  | r19 | r9 | 111171 |
| Bale monkey | Kokosa   | Forest fragment  | Dry | f5  | r22 | r9 | 69201  |
| Bale monkey | Kokosa   | Forest fragment  | Dry | f5  | r7  | r9 | 120455 |
| Bale monkey | Kokosa   | Forest fragment  | Wet | f6  | r19 | r9 | 219888 |
| Bale monkey | Kokosa   | Forest fragment  | Dry | f6  | r7  | r9 | 137429 |
| Bale monkey | Kokosa   | Forest fragment  | Dry | f7  | r12 | r9 | 144913 |
| Bale monkey | Kokosa   | Forest fragment  | Dry | f7  | r15 | r9 | 148326 |
| Bale monkey | Kokosa   | Forest fragment  | Dry | f7  | r16 | r9 | 127038 |
| Bale monkey | Kokosa   | Forest fragment  | Dry | f7  | r19 | r9 | 105732 |
| Bale monkey | Kokosa   | Forest fragment  | Dry | f7  | r3  | r9 | 88205  |
| Bale monkey | Kokosa   | Forest fragment  | Dry | f7  | r4  | r9 | 110842 |
| Bale monkey | Kokosa   | Forest fragment  | Dry | f8  | r12 | r9 | 145805 |
| Bale monkey | Kokosa   | Forest fragment  | Dry | f8  | r15 | r9 | 116079 |
| Bale monkey | Kokosa   | Forest fragment  | Dry | f8  | r16 | r9 | 132250 |
| Bale monkey | Kokosa   | Forest fragment  | Dry | f8  | r19 | r9 | 113327 |
| Bale monkey | Kokosa   | Forest fragment  | Dry | f8  | r22 | r9 | 95115  |
| Bale monkey | Kokosa   | Forest fragment  | Dry | f8  | r3  | r9 | 105109 |
| Bale monkey | Kokosa   | Forest fragment  | Dry | f8  | r4  | r9 | 116778 |
| Bale monkey | Kokosa   | Forest fragment  | Dry | f8  | r7  | r9 | 172816 |
| Bale monkey | Odobullu | Contiuous forest | Dry | f11 | r12 | r8 | 189589 |
| Bale monkey | Odobullu | Contiuous forest | Dry | f11 | r15 | r8 | 80505  |
| Bale monkey | Odobullu | Contiuous forest | Wet | f11 | r19 | r8 | 192023 |
| Bale monkey | Odobullu | Contiuous forest | Dry | f11 | r4  | r8 | 126655 |
| Bale monkey | Odobullu | Contiuous forest | Dry | f11 | r7  | r8 | 142312 |
| Bale monkey | Odobullu | Contiuous forest | Wet | f13 | r12 | r8 | 165545 |
| Bale monkey | Odobullu | Contiuous forest | Dry | f13 | r15 | r8 | 139670 |

|             |             |                            |     |     |     |    |        |
|-------------|-------------|----------------------------|-----|-----|-----|----|--------|
| Bale monkey | Odobullu    | Contiuous forest           | Wet | f13 | r16 | r8 | 159181 |
| Bale monkey | Odobullu    | Contiuous forest           | Wet | f13 | r19 | r8 | 172418 |
| Bale monkey | Odobullu    | Contiuous forest           | Wet | f13 | r22 | r8 | 93905  |
| Bale monkey | Odobullu    | Contiuous forest           | Wet | f13 | r3  | r8 | 150710 |
| Bale monkey | Odobullu    | Contiuous forest           | Wet | f13 | r4  | r8 | 139578 |
| Bale monkey | Odobullu    | Contiuous forest           | Wet | f13 | r7  | r8 | 172701 |
| Bale monkey | Odobullu    | Contiuous forest           | Wet | f16 | r12 | r8 | 149525 |
| Bale monkey | Odobullu    | Contiuous forest           | Wet | f16 | r15 | r8 | 145818 |
| Bale monkey | Odobullu    | Contiuous forest           | Wet | f16 | r19 | r8 | 121922 |
| Bale monkey | Odobullu    | Contiuous forest           | Dry | f16 | r3  | r8 | 126370 |
| Bale monkey | Odobullu    | Contiuous forest           | Dry | f16 | r4  | r8 | 146606 |
| Bale monkey | Odobullu    | Contiuous forest           | Wet | f16 | r7  | r8 | 147274 |
| Bale monkey | Odobullu    | Contiuous forest           | Dry | f19 | r12 | r8 | 159341 |
| Bale monkey | Odobullu    | Contiuous forest           | Wet | f19 | r15 | r8 | 181547 |
| Bale monkey | Odobullu    | Contiuous forest           | Dry | f19 | r16 | r8 | 151276 |
| Bale monkey | Odobullu    | Contiuous forest           | Dry | f19 | r22 | r8 | 65044  |
| Bale monkey | Odobullu    | Contiuous forest           | Dry | f19 | r3  | r8 | 194022 |
| Bale monkey | Odobullu    | Contiuous forest           | Dry | f19 | r4  | r8 | 169760 |
| Bale monkey | Odobullu    | Contiuous forest           | Dry | f19 | r7  | r8 | 158885 |
| Bale monkey | Odobullu    | Contiuous forest           | Dry | f22 | r15 | r8 | 154127 |
| Bale monkey | Odobullu    | Contiuous forest           | Wet | f6  | r16 | r8 | 195226 |
| Bale monkey | Odobullu    | Contiuous forest           | Dry | f6  | r19 | r8 | 176078 |
| Grivet      | Asella      | Plantation/forest fragment | Wet | f1  | r12 | r9 | 83723  |
| Grivet      | Asella      | Plantation/forest fragment | Wet | f1  | r15 | r9 | 133915 |
| Grivet      | Asella      | Plantation/forest fragment | Wet | f1  | r16 | r9 | 159591 |
| Grivet      | Asella      | Plantation/forest fragment | Wet | f1  | r19 | r9 | 102430 |
| Grivet      | Asella      | Plantation/forest fragment | Wet | f1  | r22 | r9 | 147245 |
| Grivet      | Asella      | Plantation/forest fragment | Wet | f1  | r3  | r9 | 87990  |
| Grivet      | Asella      | Plantation/forest fragment | Wet | f1  | r4  | r9 | 79583  |
| Grivet      | Asella      | Plantation/forest fragment | Wet | f1  | r7  | r9 | 135857 |
| Grivet      | Asella      | Plantation/forest fragment | Wet | f2  | r12 | r9 | 134338 |
| Grivet      | Asella      | Plantation/forest fragment | Wet | f2  | r15 | r9 | 124949 |
| Grivet      | Asella      | Plantation/forest fragment | Wet | f2  | r3  | r9 | 131862 |
| Grivet      | Asella      | Plantation/forest fragment | Wet | f2  | r4  | r9 | 155026 |
| Grivet      | Awassa      | Woodland                   | Dry | f16 | r22 | r7 | 150827 |
| Grivet      | Awassa      | Woodland                   | Dry | f19 | r12 | r7 | 119614 |
| Grivet      | Awassa      | Woodland                   | Dry | f19 | r15 | r7 | 204763 |
| Grivet      | Awassa      | Woodland                   | Dry | f19 | r16 | r7 | 142145 |
| Grivet      | Awassa      | Woodland                   | Dry | f19 | r22 | r7 | 103867 |
| Grivet      | Awassa      | Woodland                   | Dry | f19 | r3  | r7 | 166438 |
| Grivet      | Awassa      | Woodland                   | Dry | f19 | r4  | r7 | 164697 |
| Grivet      | Awassa      | Woodland                   | Dry | f19 | r7  | r7 | 165174 |
| Grivet      | Awassa      | Woodland                   | Dry | f22 | r12 | r7 | 119186 |
| Grivet      | Awassa      | Woodland                   | Dry | f22 | r15 | r7 | 115746 |
| Grivet      | Awassa      | Woodland                   | Dry | f22 | r3  | r7 | 110701 |
| Grivet      | Awassa      | Woodland                   | Dry | f22 | r7  | r7 | 108092 |
| Grivet      | Awassa      | Woodland                   | Dry | f6  | r19 | r7 | 157760 |
| Grivet      | Wondo Genet | Forest fragment            | Wet | f10 | r12 | r7 | 120500 |
| Grivet      | Wondo Genet | Forest fragment            | Wet | f10 | r15 | r7 | 152229 |
| Grivet      | Wondo Genet | Forest fragment            | Wet | f10 | r16 | r7 | 151862 |
| Grivet      | Wondo Genet | Forest fragment            | Wet | f10 | r19 | r7 | 118603 |
| Grivet      | Wondo Genet | Forest fragment            | Wet | f10 | r22 | r7 | 102853 |
| Grivet      | Wondo Genet | Forest fragment            | Wet | f10 | r3  | r7 | 178141 |
| Grivet      | Wondo Genet | Forest fragment            | Wet | f10 | r4  | r7 | 178064 |
| Grivet      | Wondo Genet | Forest fragment            | Wet | f11 | r3  | r7 | 149059 |
| Grivet      | Wondo Genet | Forest fragment            | Wet | f11 | r4  | r7 | 155180 |
| Grivet      | Wondo Genet | Forest fragment            | Wet | f8  | r12 | r7 | 151632 |
| Grivet      | Wondo Genet | Forest fragment            | Wet | f8  | r15 | r7 | 156107 |
| Grivet      | Wondo Genet | Forest fragment            | Wet | f8  | r16 | r7 | 150317 |
| Grivet      | Wondo Genet | Forest fragment            | Wet | f8  | r19 | r7 | 143729 |
| Grivet      | Wondo Genet | Forest fragment            | Wet | f8  | r22 | r7 | 116192 |
| Vervet      | Sof Omar    | Tree dominated forest      | Wet | f11 | r12 | r7 | 125912 |
| Vervet      | Sof Omar    | Tree dominated forest      | Wet | f11 | r15 | r7 | 128308 |
| Vervet      | Sof Omar    | Tree dominated forest      | Wet | f11 | r19 | r7 | 183132 |
| Vervet      | Sof Omar    | Tree dominated forest      | Wet | f11 | r7  | r7 | 155061 |
| Vervet      | Sof Omar    | Tree dominated forest      | Wet | f13 | r12 | r7 | 136301 |
| Vervet      | Sof Omar    | Tree dominated forest      | Wet | f13 | r15 | r7 | 162349 |
| Vervet      | Sof Omar    | Tree dominated forest      | Wet | f13 | r16 | r7 | 148777 |
| Vervet      | Sof Omar    | Tree dominated forest      | Wet | f13 | r19 | r7 | 85703  |



|               |            |                           |     |     |     |    |        |
|---------------|------------|---------------------------|-----|-----|-----|----|--------|
| Vervet        | Sof Omar   | Tree dominated forest     | Wet | f13 | r22 | r7 | 140301 |
| Vervet        | Sof Omar   | Tree dominated forest     | Wet | f13 | r4  | r7 | 133540 |
| Vervet        | Sof Omar   | Tree dominated forest     | Wet | f13 | r7  | r7 | 135196 |
| Vervet/grivet | Arba Minch | Plantation/natural forest | Dry | f6  | r7  | r7 | 78532  |
| Vervet/grivet | Arba Minch | Plantation/natural forest | Dry | f7  | r12 | r7 | 51015  |
| Vervet/grivet | Arba Minch | Plantation/natural forest | Dry | f7  | r15 | r7 | 68608  |
| Vervet/grivet | Arba Minch | Plantation/natural forest | Dry | f7  | r16 | r7 | 160061 |
| Vervet/grivet | Arba Minch | Plantation/natural forest | Dry | f7  | r19 | r7 | 96297  |
| Vervet/grivet | Arba Minch | Plantation/natural forest | Dry | f7  | r22 | r7 | 122043 |
| Vervet/grivet | Arba Minch | Plantation/natural forest | Dry | f7  | r3  | r7 | 76847  |
| Vervet/grivet | Arba Minch | Plantation/natural forest | Dry | f7  | r4  | r7 | 154700 |
| Vervet/grivet | Arba Minch | Plantation/natural forest | Dry | f8  | r3  | r7 | 70823  |
| Vervet/grivet | Arba Minch | Plantation/natural forest | Dry | f8  | r4  | r7 | 131442 |
| Vervet/grivet | Arba Minch | Plantation/natural forest | Dry | f8  | r7  | r7 | 155585 |
